# Supplementary material for: Efficient electrosynthesis of phosphinic amides via oxidative cross-coupling between N–H/P–H
Source: Royal Society of Chemistry journal article supplement (doi:10.1039/c7gc01989k), 2017-01-01
Supplement: c7gc01989k1.pdf [file c7gc01989k1.pdf]

## Supporting Information

### Efficient electrosynthesis of phosphinic amides via oxidative cross-coupling between N–H/P–H

Yukang Wang,<sup>[a]</sup> Peng Qian,<sup>[a]</sup> Ji-Hu Su,<sup>[b]</sup> Yanan Li,<sup>[a]</sup> Meixiang Bi,<sup>[a]</sup> Zhenggen Zha\*<sup>[a]</sup> and Zhiyong Wang\*<sup>[a]</sup>

*[a] Hefei National Laboratory for Physical Sciences at Microscale, CAS Key Laboratory of Soft Matter Chemistry and Department of Chemistry & Collaborative Innovation Center of Suzhou Nano Science and Technology, University of Science and Technology of China, Hefei, Anhui 230026, P. R. China*

*[b] CAS Key Laboratory of Microscale Magnetic Resonance, Department of Modern Physics, University of Science and Technology of China, Hefei, Anhui 230026, P. R. China*

Fax: (+86)551-3603185; E-mail: [zwang3@ustc.edu.cn](mailto:zwang3@ustc.edu.cn), [zgza@ustc.edu.cn](mailto:zgza@ustc.edu.cn)

### Contents

|                                                              |       |
|--------------------------------------------------------------|-------|
| Experimental Section                                         | 2     |
| Characterization data for the products                       | 2-11  |
| ESI-HRMS analysis for the TEMPO–P(O)Ph <sub>2</sub> adduct 4 | 11-12 |
| NMR spectra for the products                                 | 12-48 |
| Crystal structure data                                       | 48-56 |

## Experimental Section

### General Information

$^1\text{H}$  NMR,  $^{13}\text{C}$  NMR and  $^{31}\text{P}$  NMR were recorded on a Bruker-400MHz Spectrometer ( $^1\text{H}$  NMR: 400MHz,  $^{13}\text{C}$  NMR: 100MHz,  $^{31}\text{P}$  NMR: 162MHz) using TMS as internal reference. The chemical shifts ( $\delta$ ) and coupling constants ( $J$ ) were expressed in ppm and Hz, respectively. HRMS (ESI) were recorded on a Waters<sup>TM</sup> Q-TOF Premier. Commercially available compounds were used without further purification. Solvents were purified according to the standard procedures unless otherwise noted.

### Instruments

The instrument for electrolysis is dual display potentiostat (CJS-292) (made in China). The anode electrode and cathode electrode all are Pt ( $1.5 \times 1.5 \text{ cm}^2$ ).

### Experimental procedure

A mixture of **1a** derivatives (0.3mmol) and **2** (0.9mmol), KI (1mmol) and EtOH (10mL) was added to an undivided cell. The cell was equipped with platinum electrodes ( $1.5 \times 1.5 \text{ cm}^2$ ) as both the anode and cathode. The reaction mixture was stirred and electrolyzed at a constant current of 30 mA under room temperature for corresponding time. When the reaction was finished, the solvent was removed with a rotary evaporator. The residue was purified by column chromatography on silica gel to afford the desired product.

## Characterization data for the products

### morpholinodiphenylphosphine oxide (**3aa**)

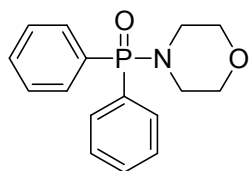

**3aa**

The compound **3aa** was prepared according to the general working procedure (4 h) and purified by column chromatography (ethyl acetate) to give the product as a yellow oil: 86% yield;  $^1\text{H}$  NMR (400 MHz,  $\text{CDCl}_3$ , ppm):  $\delta$  = 7.90–7.86 (m, 4H), 7.53–7.44 (m, 6H), 3.71 (t,  $J$  = 4.5 Hz, 4H), 3.08 (m, 4H);  $^{13}\text{C}$  NMR (100 MHz,

CDCl<sub>3</sub>, ppm):  $\delta$  = 131.3 (d,  $J$  = 9.1 Hz), 131.0 (d,  $J$  = 2.7 Hz), 129.7 (d,  $J$  = 128.5 Hz), 127.7 (d,  $J$  = 12.4 Hz), 66.2 (d,  $J$  = 6.7 Hz), 43.9; <sup>31</sup>P NMR (162 MHz, CDCl<sub>3</sub>, ppm)  $\delta$  = 29.17. HRMS (ESI) calcd for C<sub>16</sub>H<sub>19</sub>NO<sub>2</sub>P [M + H]<sup>+</sup> 288.1153, found 288.1152.

#### diphenyl(piperidin-1-yl)phosphine oxide (3ab)

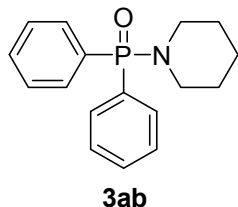

The compound **3ab** was prepared according to the general working procedure (4 h) and purified by column chromatography (ethyl acetate) to give the product as a yellow solid: 75% yield; mp = 112-114 °C; <sup>1</sup>H NMR (400 MHz, CDCl<sub>3</sub>, ppm):  $\delta$  = 7.90–7.85 (m, 4H), 7.50–7.42 (m, 6H), 3.04-3.00 (m, 4H), 1.63-1.61 (m, 2H), 1.58-1.57 (m, 4H); <sup>13</sup>C NMR (100 MHz, CDCl<sub>3</sub>, ppm):  $\delta$  = 131.3 (d,  $J$  = 9.7 Hz), 130.9 (d,  $J$  = 128.7 Hz), 130.6 (d,  $J$  = 2.7 Hz), 127.5 (d,  $J$  = 12.3 Hz), 44.7, 25.2 (d,  $J$  = 6.8 Hz), 23.5; <sup>31</sup>P NMR (162 MHz, CDCl<sub>3</sub>, ppm)  $\delta$  = 28.99. HRMS (ESI) calcd for C<sub>17</sub>H<sub>21</sub>NOP [M + H]<sup>+</sup> 286.1361, found 286.1361.

#### (4-methylpiperidin-1-yl)diphenylphosphine oxide (3ac)

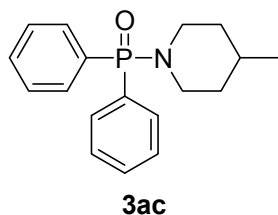

The compound **3ac** was prepared according to the general working procedure (4 h) and purified by column chromatography (ethyl acetate) to give the product as a yellow solid: 84% yield; mp = 131-132 °C; <sup>1</sup>H NMR (400 MHz, CDCl<sub>3</sub>, ppm):  $\delta$  = 7.81–7.76 (m, 4H), 7.40–7.32 (m, 6H), 3.20-3.15 (m, 2H), 2.72-2.66 (m, 2H), 1.51-1.39 (m, 3H), 1.17-1.07 (m, 2H), 0.86 (d,  $J$  = 6.3 Hz, 3H); <sup>13</sup>C NMR (100 MHz, CDCl<sub>3</sub>, ppm):  $\delta$  = 132.3 (d,  $J$  = 128.7 Hz), 132.1 (d,  $J$  = 8.9 Hz), 131.4 (d,  $J$  = 2.5 Hz), 128.3 (d,  $J$  = 12.2 Hz), 45.0, 34.4 (d,  $J$  = 7.2 Hz), 30.8, 21.9; <sup>31</sup>P NMR (162 MHz, CDCl<sub>3</sub>, ppm)  $\delta$  = 28.98. HRMS (ESI) calcd for C<sub>18</sub>H<sub>23</sub>NOP [M + H]<sup>+</sup> 300.1517, found 300.1517.

#### (4-benzylpiperidin-1-yl)diphenylphosphine oxide (3ad)

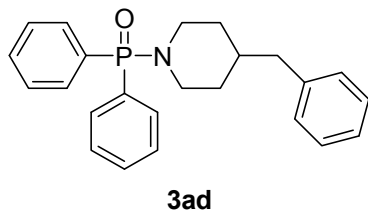

The compound **3ad** was prepared according to the general working procedure (4 h) and purified by column chromatography (ethyl acetate) to give the product as a yellow oil: 86% yield;  $^1\text{H NMR}$  (400 MHz,  $\text{CDCl}_3$ , ppm):  $\delta$  = 7.89–7.84 (m, 4H), 7.49–7.43 (m, 6H), 7.27–7.24 (m, 2H), 7.19–7.11 (m, 3H), 3.27 (s, 2H), 2.77–2.70 (m, 2H), 2.57 (d,  $J$  = 7.2 Hz, 2H), 1.72–1.66 (m, 1H), 1.62–1.59 (m, 2H), 1.32–1.29 (m, 2H);  $^{13}\text{C NMR}$  (100 MHz,  $\text{CDCl}_3$ , ppm):  $\delta$  = 140.0, 132.1 (d,  $J$  = 9.1 Hz), 131.7 (d,  $J$  = 128.8 Hz), 131.6 (d,  $J$  = 2.6 Hz), 129.0, 128.5 (d,  $J$  = 12.3 Hz), 128.1, 125.8, 45.1, 43.3, 38.1, 32.5 (d,  $J$  = 7.0 Hz);  $^{31}\text{P NMR}$  (162 MHz,  $\text{CDCl}_3$ , ppm)  $\delta$  = 29.27. HRMS (ESI) calcd for  $\text{C}_{24}\text{H}_{27}\text{NOP}$   $[\text{M} + \text{H}]^+$  376.1830, found 376.1826.

#### (4-hydroxypiperidin-1-yl)diphenylphosphine oxide (**3ae**)

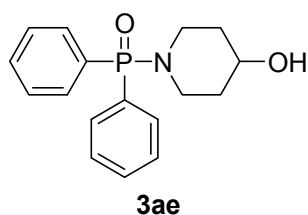

The compound **3ae** was prepared according to the general working procedure (4 h) and purified by column chromatography (ethyl acetate / methanol = 20:1) to give the product as a yellow oil: 83% yield;  $^1\text{H NMR}$  (400 MHz,  $\text{CDCl}_3$ , ppm):  $\delta$  = 7.87–7.82 (m, 4H), 7.50–7.43 (m, 6H), 3.83–3.79 (m, 1H), 3.48 (s, 1H), 3.31–3.28 (m, 2H), 2.87–2.80 (m, 2H), 1.91–1.88 (m, 2H), 1.62–1.53 (m, 2H);  $^{13}\text{C NMR}$  (100 MHz,  $\text{CDCl}_3$ , ppm):  $\delta$  = 132.1 (d,  $J$  = 9.1 Hz), 131.7 (d,  $J$  = 2.4 Hz), 131.3 (d,  $J$  = 129.4 Hz), 128.6 (d,  $J$  = 12.4 Hz), 67.2, 42.8, 34.8 (d,  $J$  = 6.5 Hz);  $^{31}\text{P NMR}$  (162 MHz,  $\text{CDCl}_3$ , ppm)  $\delta$  = 29.77. HRMS (ESI) calcd for  $\text{C}_{17}\text{H}_{21}\text{NO}_2\text{P}$   $[\text{M} + \text{H}]^+$  302.1310, found 302.1309.

#### (4-(hydroxymethyl)piperidin-1-yl)diphenylphosphine oxide (**3af**)

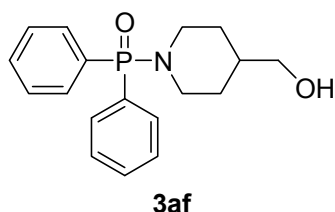

The compound **3af** was prepared according to the general working procedure (4 h) and purified by column chromatography (ethyl acetate / methanol = 20:1) to give the product as a yellow oil: 79% yield;  $^1\text{H NMR}$  (400 MHz,  $\text{CDCl}_3$ , ppm):  $\delta$  = 7.88–7.83 (m, 4H), 7.50–7.44 (m, 6H), 3.53 (d,  $J$  = 5.5 Hz, 2H), 3.31–3.30 (m, 2H), 2.84–2.76 (m, 2H), 2.59 (s, 1H), 1.71–1.69 (m, 3H), 1.35–1.30 (m, 2H);  $^{13}\text{C NMR}$  (100 MHz,  $\text{CDCl}_3$ , ppm):  $\delta$  = 131.2 (d,  $J$  = 9.2 Hz), 130.7 (d,  $J$  = 2.6 Hz), 130.0, 127.6 (d,  $J$  = 12.4 Hz), 60.4, 44.0, 37.7, 28.2 (d,  $J$  = 6.7 Hz);  $^{31}\text{P NMR}$  (162 MHz,  $\text{CDCl}_3$ , ppm)  $\delta$  = 29.71. HRMS (ESI) calcd for  $\text{C}_{18}\text{H}_{23}\text{NO}_2\text{P}$   $[\text{M} + \text{H}]^+$  316.1466, found 316.1459.



**(4-(diphenylphosphoryl)piperazin-1-yl)(phenyl)methanone (3ag)**

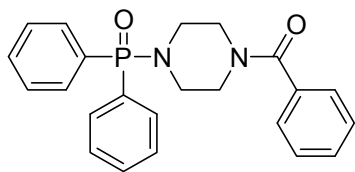

**3ag**

The compound **3ag** was prepared according to the general working procedure (4 h) and purified by column chromatography (ethyl acetate / methanol = 20:1) to give the product as a yellow oil: 64% yield;  $^1\text{H}$  NMR (400 MHz,  $\text{CDCl}_3$ , ppm):  $\delta$  = 7.89–7.84 (m, 4H), 7.54–7.47 (m, 6H), 7.37 (s, 5H), 3.81–3.46 (m, 4H), 3.15–3.06 (m, 4H);  $^{13}\text{C}$  NMR (100 MHz,  $\text{CDCl}_3$ , ppm):  $\delta$  = 169.5, 134.4, 131.3 (d,  $J$  = 9.2 Hz), 131.1 (d,  $J$  = 2.4 Hz), 129.7 (d,  $J$  = 128.1 Hz), 128.8, 127.8 (d,  $J$  = 12.4 Hz), 127.5, 125.9, 44.1;  $^{31}\text{P}$  NMR (162 MHz,  $\text{CDCl}_3$ , ppm)  $\delta$  = 30.00. HRMS (ESI) calcd for  $\text{C}_{23}\text{H}_{24}\text{N}_2\text{O}_2\text{P}$  [ $\text{M} + \text{H}$ ] $^+$  319.1575, found 319.1571.

**(4-(methylsulfonyl)piperazin-1-yl)diphenylphosphine oxide (3ah)**

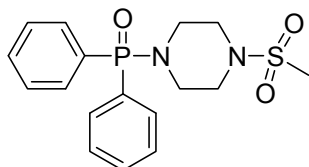

**3ah**

The compound **3ah** was prepared according to the general working procedure (4 h) and purified by column chromatography (ethyl acetate / methanol = 20:1) to give the product as a yellow solid: 54% yield; mp = 176–178 °C;  $^1\text{H}$  NMR (400 MHz,  $\text{CDCl}_3$ , ppm):  $\delta$  = 7.88–7.84 (m, 4H), 7.56–7.48 (m, 6H), 3.25–3.22 (m, 8H), 2.80 (s, 3H);  $^{13}\text{C}$  NMR (100 MHz,  $\text{CDCl}_3$ , ppm):  $\delta$  = 132.19 (d,  $J$  = 9.1 Hz), 132.18 (d,  $J$  = 2.7 Hz), 130.5 (d,  $J$  = 128.7 Hz), 128.8 (d,  $J$  = 12.5 Hz), 46.2 (d,  $J$  = 4.3 Hz), 44.9, 34.3;  $^{31}\text{P}$  NMR (162 MHz,  $\text{CDCl}_3$ , ppm)  $\delta$  = 30.23. HRMS (ESI) calcd for  $\text{C}_{17}\text{H}_{22}\text{N}_2\text{O}_3\text{PS}$  [ $\text{M} + \text{H}$ ] $^+$  365.1079, found 365.1082.

**diphenyl(pyrrolidin-1-yl)phosphine oxide (3ai)**

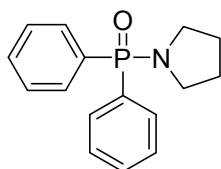

**3ai**

The compound **3ai** was prepared according to the general working procedure (4 h) and purified by column chromatography (ethyl acetate) to give the product as a yellow solid: 91% yield; mp = 92–93 °C;  $^1\text{H}$  NMR (400 MHz,  $\text{CDCl}_3$ , ppm):  $\delta$  = 7.91–7.87 (m, 4H), 7.49–7.42 (m, 6H), 3.14–3.10 (m, 4H), 1.88 (t,  $J$  = 6.3 Hz, 4H);  $^{13}\text{C}$  NMR (100 MHz,  $\text{CDCl}_3$ , ppm):  $\delta$  = 131.6 (d,  $J$  = 129.1 Hz), 131.2 (d,  $J$  = 9.3 Hz),

130.6 (d,  $J = 2.5$  Hz), 127.5 (d,  $J = 12.3$  Hz), 45.9 (d,  $J = 2.0$  Hz), 25.6 (d,  $J = 6.7$  Hz);  $^{31}\text{P}$  NMR (162 MHz,  $\text{CDCl}_3$ , ppm)  $\delta = 25.40$ . HRMS (ESI) calcd for  $\text{C}_{16}\text{H}_{19}\text{NOP}$  [ $\text{M} + \text{H}$ ] $^+$  272.1204, found 272.1206.

**((3*aR*, 7*aS*)-octahydro-2*H*-isoindol-2-yl)diphenylphosphine oxide (3aj)**

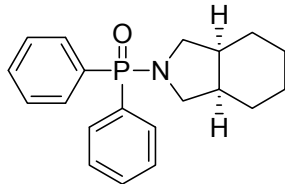

**3aj**

The compound **3aj** was prepared according to the general working procedure (4 h) and purified by column chromatography (ethyl acetate) to give the product as a yellow oil: 88% yield;  $^1\text{H}$  NMR (400 MHz,  $\text{CDCl}_3$ , ppm):  $\delta = 7.92\text{--}7.88$  (m, 4H), 7.49–7.44 (m, 6H), 3.19–3.14 (m, 2H), 2.99–2.94 (m, 2H), 2.23 (s, 2H), 1.61–1.49 (m, 6H), 1.32–1.31 (m, 2H);  $^{13}\text{C}$  NMR (100 MHz,  $\text{CDCl}_3$ , ppm):  $\delta = 131.6$  (d,  $J = 129.5$  Hz), 131.2 (d,  $J = 9.0$  Hz), 130.6 (d,  $J = 2.5$  Hz), 127.5 (d,  $J = 12.3$  Hz), 49.6 (d,  $J = 1.1$  Hz), 37.5 (d,  $J = 6.2$  Hz), 24.6, 21.8;  $^{31}\text{P}$  NMR (162 MHz,  $\text{CDCl}_3$ , ppm)  $\delta = 25.08$ . HRMS (ESI) calcd for  $\text{C}_{20}\text{H}_{25}\text{NOP}$  [ $\text{M} + \text{H}$ ] $^+$  326.1674, found 326.1674.

**(2,5-dihydro-1*H*-pyrrol-1-yl)diphenylphosphine oxide (3ak)**

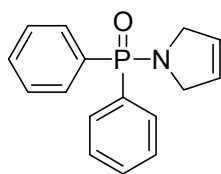

**3ak**

The compound **3ak** was prepared according to the general working procedure (4 h) and purified by column chromatography (ethyl acetate) to give the product as a yellow solid: 80% yield; mp = 118–120 °C;  $^1\text{H}$  NMR (400 MHz,  $\text{CDCl}_3$ , ppm):  $\delta = 7.93\text{--}7.88$  (m, 4H), 7.52–7.44 (m, 6H), 5.77 (s, 2H), 3.99 (d,  $J = 5.8$  Hz, 4H);  $^{13}\text{C}$  NMR (100 MHz,  $\text{CDCl}_3$ , ppm):  $\delta = 132.2$  (d,  $J = 9.4$  Hz), 132.1 (d,  $J = 128.7$  Hz), 131.7 (d,  $J = 2.5$  Hz), 128.6 (d,  $J = 12.4$  Hz), 126.5 (d,  $J = 7.3$  Hz), 54.2 (d,  $J = 3.5$  Hz);  $^{31}\text{P}$  NMR (162 MHz,  $\text{CDCl}_3$ , ppm)  $\delta = 25.06$ . HRMS (ESI) calcd for  $\text{C}_{16}\text{H}_{17}\text{NOP}$  [ $\text{M} + \text{H}$ ] $^+$  270.1048, found 270.1048.

***N,N*-diethyl-*P,P*-diphenylphosphinic amide (3al)**

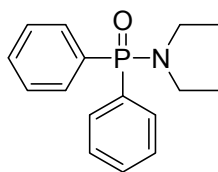

**3al**

The compound **3al** was prepared according to the general working procedure (4 h)

and purified by column chromatography (ethyl acetate) to give the product as a yellow solid: 57% yield; mp = 123-125 °C;  $^1\text{H}$  NMR (400 MHz,  $\text{CDCl}_3$ , ppm):  $\delta$  = 7.88–7.84 (m, 4H), 7.50–7.42 (m, 6H), 3.07 (dt,  $J$  = 17.9, 7.0 Hz, 4H), 1.10 (t,  $J$  = 7.0 Hz, 6H);  $^{13}\text{C}$  NMR (100 MHz,  $\text{CDCl}_3$ , ppm):  $\delta$  = 132.5 (d,  $J$  = 127.8 Hz), 132.2 (d,  $J$  = 9.1 Hz), 131.5 (d,  $J$  = 2.7 Hz), 128.3 (d,  $J$  = 12.3 Hz), 39.2 (d,  $J$  = 3.4 Hz), 14.0 (d,  $J$  = 3.9 Hz);  $^{31}\text{P}$  NMR (162 MHz,  $\text{CDCl}_3$ , ppm)  $\delta$  = 30.56. HRMS (ESI) calcd for  $\text{C}_{16}\text{H}_{21}\text{NOP}$   $[\text{M} + \text{H}]^+$  274.1361, found 274.1360.

### N-benzyl-N-methyl-P,P-diphenylphosphinic amide (3am)

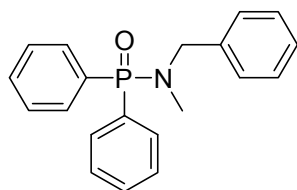

**3am**

The compound **3am** was prepared according to the general working procedure (4 h) and purified by column chromatography (ethyl acetate) to give the product as a yellow oil: 77% yield;  $^1\text{H}$  NMR (400 MHz,  $\text{CDCl}_3$ , ppm):  $\delta$  = 7.96–7.91 (m, 4H), 7.51–7.42 (m, 6H), 7.37–7.32 (m, 4H), 7.28–7.24 (m, 1H), 4.13 (d,  $J$  = 7.7 Hz, 2H), 2.54 (d,  $J$  = 11.0 Hz, 3H);  $^{13}\text{C}$  NMR (100 MHz,  $\text{CDCl}_3$ , ppm):  $\delta$  = 137.4 (d,  $J$  = 7.1 Hz), 132.2 (d,  $J$  = 9.2 Hz), 131.7 (d,  $J$  = 2.7 Hz), 131.6 (d,  $J$  = 128.0 Hz), 128.6, 128.4 (d,  $J$  = 4.5 Hz), 127.9, 127.2, 52.8 (d,  $J$  = 3.0 Hz), 33.6 (d,  $J$  = 2.6 Hz);  $^{31}\text{P}$  NMR (162 MHz,  $\text{CDCl}_3$ , ppm)  $\delta$  = 31.66. HRMS (ESI) calcd for  $\text{C}_{20}\text{H}_{21}\text{NOP}$   $[\text{M} + \text{H}]^+$  322.1361, found 322.1359.

### morpholinodi-*p*-tolylphosphine oxide (3ba)

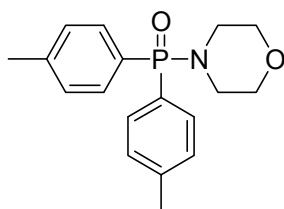

**3ba**

The compound **3ba** was prepared according to the general working procedure (4 h) and purified by column chromatography (ethyl acetate) to give the product as a yellow oil: 77% yield;  $^1\text{H}$  NMR (400 MHz,  $\text{CDCl}_3$ , ppm):  $\delta$  = 7.77–7.72 (m, 4H), 7.27–7.26 (m, 4H), 3.70 (s, 4H), 3.06 (s, 4H), 2.37 (s, 6H);  $^{13}\text{C}$  NMR (100 MHz,  $\text{CDCl}_3$ , ppm):  $\delta$  = 142.3 (d,  $J$  = 2.6 Hz), 132.3 (d,  $J$  = 9.4 Hz), 129.4 (d,  $J$  = 12.7 Hz), 127.6 (d,  $J$  = 131.0 Hz), 67.2 (d,  $J$  = 6.7 Hz), 44.9, 21.5;  $^{31}\text{P}$  NMR (162 MHz,  $\text{CDCl}_3$ , ppm)  $\delta$  = 29.89. HRMS (ESI) calcd for  $\text{C}_{18}\text{H}_{23}\text{NO}_2\text{P}$   $[\text{M} + \text{H}]^+$  316.1466, found 316.1464.

### bis(3,5-dimethylphenyl)(morpholino)phosphine oxide (3ca)

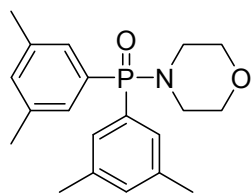

**3ca**

The compound **3ca** was prepared according to the general working procedure (4 h) and purified by column chromatography (ethyl acetate) to give the product as a yellow solid: 86% yield; mp = 122-124 °C;  $^1\text{H}$  NMR (400 MHz,  $\text{CDCl}_3$ , ppm):  $\delta$  = 7.49 (s, 2H), 7.46 (s, 2H), 7.12 (s, 2H), 3.71 (t,  $J$  = 4.5 Hz, 4H), 3.09-3.05 (m, 4H), 2.34 (s, 12H);  $^{13}\text{C}$  NMR (100 MHz,  $\text{CDCl}_3$ , ppm):  $\delta$  = 138.3 (d,  $J$  = 12.9 Hz), 133.6 (d,  $J$  = 2.7 Hz), 130.5 (d,  $J$  = 126.9 Hz), 129.9 (d,  $J$  = 8.9 Hz), 67.2 (d,  $J$  = 6.6 Hz), 45.0, 21.3;  $^{31}\text{P}$  NMR (162 MHz,  $\text{CDCl}_3$ , ppm)  $\delta$  = 30.15. HRMS (ESI) calcd for  $\text{C}_{20}\text{H}_{27}\text{NO}_2\text{P}$   $[\text{M} + \text{H}]^+$  344.1779, found 344.1780.

**bis(4-methoxyphenyl)(morpholino)phosphine oxide (3da)**

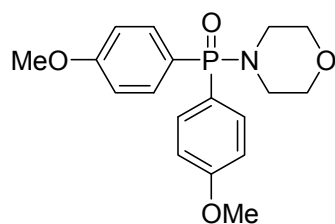

**3da**

The compound **3da** was prepared according to the general working procedure (4 h) and purified by column chromatography (ethyl acetate) to give the product as a yellow oil: 76% yield;  $^1\text{H}$  NMR (400 MHz,  $\text{CDCl}_3$ , ppm):  $\delta$  = 7.80–7.75 (m, 4H), 6.98–6.96 (m, 4H), 3.83 (s, 6H), 3.69 (t,  $J$  = 4.4 Hz, 4H), 3.07-3.03 (m, 4H);  $^{13}\text{C}$  NMR (100 MHz,  $\text{CDCl}_3$ , ppm):  $\delta$  = 162.4 (d,  $J$  = 2.8 Hz), 134.0 (d,  $J$  = 10.4 Hz), 120.0 (d,  $J$  = 135.9 Hz), 114.2 (d,  $J$  = 13.3 Hz), 67.1 (d,  $J$  = 6.8 Hz), 55.2, 44.8;  $^{31}\text{P}$  NMR (162 MHz,  $\text{CDCl}_3$ , ppm)  $\delta$  = 29.75. HRMS (ESI) calcd for  $\text{C}_{18}\text{H}_{23}\text{NO}_4\text{P}$   $[\text{M} + \text{H}]^+$  348.1365, found 348.1364.

**bis(3-methoxyphenyl)(morpholino)phosphine oxide (3ea)**

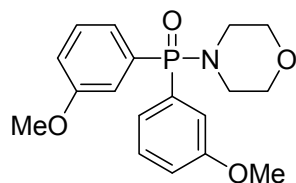

**3ea**

The compound **3ea** was prepared according to the general working procedure (4 h) and purified by column chromatography (ethyl acetate) to give the product as a yellow oil: 72% yield;  $^1\text{H}$  NMR (400 MHz,  $\text{CDCl}_3$ , ppm):  $\delta$  = 7.45–7.37 (m, 6H), 7.05–7.03 (m, 2H), 3.84 (s, 6H), 3.71 (t,  $J$  = 4.4 Hz, 4H), 3.10-3.06 (m, 4H);  $^{13}\text{C}$

**NMR** (100 MHz, CDCl<sub>3</sub>, ppm):  $\delta$  = 158.7 (d,  $J$  = 15.5 Hz), 131.1 (d,  $J$  = 127.9 Hz), 128.9 (d,  $J$  = 14.6 Hz), 123.3 (d,  $J$  = 8.8 Hz), 117.1 (d,  $J$  = 2.7 Hz), 116.3 (d,  $J$  = 10.4 Hz), 66.2 (d,  $J$  = 6.8 Hz), 54.4, 44.0; **<sup>31</sup>P NMR** (162 MHz, CDCl<sub>3</sub>, ppm)  $\delta$  = 29.31. HRMS (ESI) calcd for C<sub>18</sub>H<sub>23</sub>NO<sub>4</sub>P [M + H]<sup>+</sup> 348.1365, found 348.1363.

**bis(4-chlorophenyl)(morpholino)phosphine oxide (3fa)**

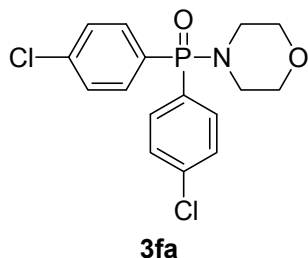

The compound **3fa** was prepared according to the general working procedure (4 h) and purified by column chromatography (ethyl acetate) to give the product as a yellow solid: 75% yield; mp = 139-141 °C; **<sup>1</sup>H NMR** (400 MHz, CDCl<sub>3</sub>, ppm):  $\delta$  = 7.82-7.77 (m, 4H), 7.47-7.45 (m, 4H), 3.71 (s, 4H), 3.06 (s, 4H); **<sup>13</sup>C NMR** (100 MHz, CDCl<sub>3</sub>, ppm):  $\delta$  = 138.9 (d,  $J$  = 3.3 Hz), 133.8 (d,  $J$  = 9.9 Hz), 129.2 (d,  $J$  = 13.0 Hz), 129.0 (d,  $J$  = 131.1 Hz), 67.1 (d,  $J$  = 6.5 Hz), 45.0; **<sup>31</sup>P NMR** (162 MHz, CDCl<sub>3</sub>, ppm)  $\delta$  = 27.22. HRMS (ESI) calcd for C<sub>16</sub>H<sub>17</sub>Cl<sub>2</sub>NO<sub>2</sub>P [M + H]<sup>+</sup> 356.0374, found 356.0377.

**bis(4-fluorophenyl)(morpholino)phosphine oxide (3ga)**

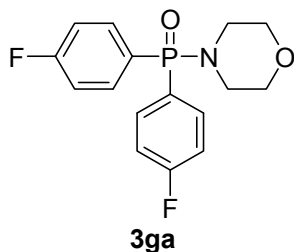

The compound **3ga** was prepared according to the general working procedure (4 h) and purified by column chromatography (ethyl acetate) to give the product as a yellow oil: 78% yield; **<sup>1</sup>H NMR** (400 MHz, CDCl<sub>3</sub>, ppm):  $\delta$  = 7.90-7.84 (m, 4H), 7.19-7.15 (m, 4H), 3.71 (t,  $J$  = 4.2 Hz, 4H), 3.08-3.04 (m, 4H); **<sup>13</sup>C NMR** (100 MHz, CDCl<sub>3</sub>, ppm):  $\delta$  = 165.2 (dd,  $J$  = 252.4 (C<sub>C,F</sub>), 3.36 Hz), 134.8 (dd,  $J$  = 10.0, 8.9 Hz), 126.6 (dd,  $J$  = 132.8, 3.37 (C<sub>C,F</sub>) Hz), 116.2 (dd,  $J$  = 21.2, 13.6 Hz), 67.1 (d,  $J$  = 6.6 Hz), 45.0; **<sup>31</sup>P NMR** (162 MHz, CDCl<sub>3</sub>, ppm)  $\delta$  = 27.37. HRMS (ESI) calcd for C<sub>16</sub>H<sub>17</sub>F<sub>2</sub>NO<sub>2</sub>P [M + H]<sup>+</sup> 324.0965, found 324.0965.

**morpholinodi(naphthalen-2-yl)phosphine oxide (3ha)**

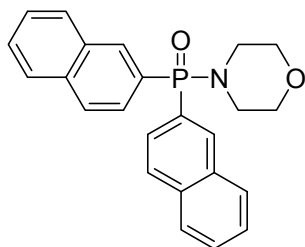

**3ha**

The compound **3ha** was prepared according to the general working procedure (4 h) and purified by column chromatography (ethyl acetate) to give the product as a yellow oil: 85% yield;  $^1\text{H NMR}$  (400 MHz,  $\text{CDCl}_3$ , ppm):  $\delta$  = 8.59 (d,  $J$  = 13.9 Hz, 2H), 7.95–7.84 (m, 8H), 7.59–7.52 (m, 4H), 3.77 (s, 4H), 3.17 (s, 4H);  $^{13}\text{C NMR}$  (100 MHz,  $\text{CDCl}_3$ , ppm):  $\delta$  = 135.1 (d,  $J$  = 9.2 Hz), 134.7 (d,  $J$  = 2.1 Hz), 132.6 (d,  $J$  = 13.8 Hz), 128.9, 128.6, 128.5, 128.3, 127.3 (d,  $J$  = 78.7 Hz), 127.2, 126.6 (d,  $J$  = 9.3 Hz), 67.3 (d,  $J$  = 6.7 Hz), 45.1;  $^{31}\text{P NMR}$  (162 MHz,  $\text{CDCl}_3$ , ppm)  $\delta$  = 29.29. HRMS (ESI) calcd for  $\text{C}_{24}\text{H}_{23}\text{NO}_2\text{P}$  [ $\text{M} + \text{H}$ ] $^+$  388.1466, found 388.1467.

#### ethyl morpholino(phenyl)phosphinate (3ia)

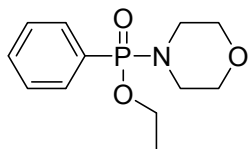

**3ia**

The compound **3ia** was prepared according to the general working procedure (4 h) and purified by column chromatography (ethyl acetate) to give the product as a yellow oil: 88% yield;  $^1\text{H NMR}$  (400 MHz,  $\text{CDCl}_3$ , ppm):  $\delta$  = 7.76–7.71 (m, 2H), 7.54–7.45 (m, 3H), 4.22–4.09 (m, 2H), 3.63 (s, 4H), 3.11–3.10 (m, 4H), 1.39 (t,  $J$  = 7.0 Hz, 3H);  $^{13}\text{C NMR}$  (100 MHz,  $\text{CDCl}_3$ , ppm):  $\delta$  = 131.7 (d,  $J$  = 2.9 Hz), 131.1 (d,  $J$  = 9.4 Hz), 129.7 (d,  $J$  = 172.5 Hz), 128.3 (d,  $J$  = 14.0 Hz), 66.8 (d,  $J$  = 5.7 Hz), 60.5 (d,  $J$  = 5.9 Hz), 40.9, 16.2 (d,  $J$  = 6.5 Hz);  $^{31}\text{P NMR}$  (162 MHz,  $\text{CDCl}_3$ , ppm)  $\delta$  = 21.04. HRMS (ESI) calcd for  $\text{C}_{12}\text{H}_{19}\text{NO}_3\text{P}$  [ $\text{M} + \text{H}$ ] $^+$  256.1103, found 256.1103.

#### bis(3,5-dimethylphenyl)(piperidin-1-yl)phosphine oxide (3cb)

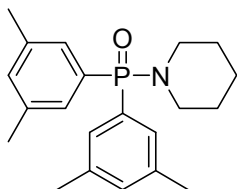

**3cb**

The compound **3cb** was prepared according to the general working procedure (4 h) and purified by column chromatography (ethyl acetate) to give the product as a yellow solid: 84% yield; mp = 145–146 °C;  $^1\text{H NMR}$  (400 MHz,  $\text{CDCl}_3$ , ppm):  $\delta$  = 7.50 (s, 2H), 7.47 (s, 2H), 7.09 (s, 2H), 3.02–2.98 (m, 4H), 2.33 (s, 12H), 1.63–1.56 (m, 6H);  $^{13}\text{C NMR}$  (100 MHz,  $\text{CDCl}_3$ , ppm):  $\delta$  = 137.0 (d,  $J$  = 12.8 Hz), 132.2 (d,  $J$  = 2.8

Hz), 130.8 (d,  $J = 127.3$  Hz), 128.8 (d,  $J = 8.9$  Hz), 44.7, 25.2 (d,  $J = 6.8$  Hz), 23.6, 20.3;  $^{31}\text{P}$  NMR (162 MHz,  $\text{CDCl}_3$ , ppm)  $\delta = 29.89$ . HRMS (ESI) calcd for  $\text{C}_{21}\text{H}_{29}\text{NOP}$   $[\text{M} + \text{H}]^+$  342.1987, found 342.1985.

**(2,5-dihydro-1H-pyrrol-1-yl)bis(3,5-dimethylphenyl)phosphine oxide (3ck)**

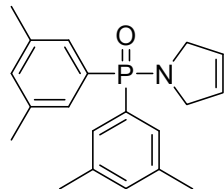

**3ck**

The compound **3ck** was prepared according to the general working procedure (4 h) and purified by column chromatography (ethyl acetate) to give the product as a yellow solid: 86% yield; mp = 132-134 °C;  $^1\text{H}$  NMR (400 MHz,  $\text{CDCl}_3$ , ppm):  $\delta = 7.53$  (s, 2H), 7.50 (s, 2H), 7.11 (s, 2H), 5.76 (s, 2H), 3.98 (d,  $J = 6.0$  Hz, 4H), 2.34 (s, 12H);  $^{13}\text{C}$  NMR (100 MHz,  $\text{CDCl}_3$ , ppm):  $\delta = 137.2$  (d,  $J = 13.0$  Hz), 132.4 (d,  $J = 2.8$  Hz), 131.0 (d,  $J = 127.6$  Hz), 128.8 (d,  $J = 9.3$  Hz), 125.5 (d,  $J = 7.2$  Hz), 53.2 (d,  $J = 3.4$  Hz), 20.3;  $^{31}\text{P}$  NMR (162 MHz,  $\text{CDCl}_3$ , ppm)  $\delta = 25.86$ . HRMS (ESI) calcd for  $\text{C}_{20}\text{H}_{25}\text{NOP}$   $[\text{M} + \text{H}]^+$  326.1674, found 326.1672.

**ethyl(morpholino)(phenyl)phosphine oxide (3ja)**

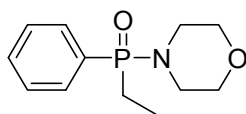

**3ja**

The compound **3ja** was prepared according to the general working procedure (4 h) and purified by column chromatography (ethyl acetate) to give the product as a yellow oil: 67% yield;  $^1\text{H}$  NMR (400 MHz,  $\text{CDCl}_3$ , ppm):  $\delta = 7.78$ -7.73 (m, 2H), 7.56-7.47 (m, 3H), 3.69 (t,  $J = 4.6$  Hz, 4H), 3.12-3.01 (m, 4H), 2.09-1.96 (m, 2H), 1.14-1.06 (m, 3H);  $^{13}\text{C}$  NMR (100 MHz,  $\text{CDCl}_3$ , ppm):  $\delta = 130.9$  (d,  $J = 2.5$  Hz), 130.7 (d,  $J = 9.0$  Hz), 129.5 (d,  $J = 118.9$  Hz), 127.6 (d,  $J = 11.8$  Hz), 66.1 (d,  $J = 6.8$  Hz), 43.3, 19.0 (d,  $J = 91.7$  Hz), 5.1 (d,  $J = 4.4$  Hz);  $^{31}\text{P}$  NMR (162 MHz,  $\text{CDCl}_3$ , ppm)  $\delta = 40.04$ . HRMS (ESI) calcd for  $\text{C}_{12}\text{H}_{19}\text{NO}_2\text{P}$   $[\text{M} + \text{H}]^+$  240.1153, found 240.1156.

**ESI-HRMS analysis for the TEMPO–P(O)Ph<sub>2</sub> adduct 4**

The adduct **4** was detected by ESI-HRMS measurement of the crude reaction mixture. HRMS (ESI) calcd for  $\text{C}_{21}\text{H}_{29}\text{NOP}$   $[\text{M} + \text{H}]^+$  358.1936, found 358.1938.

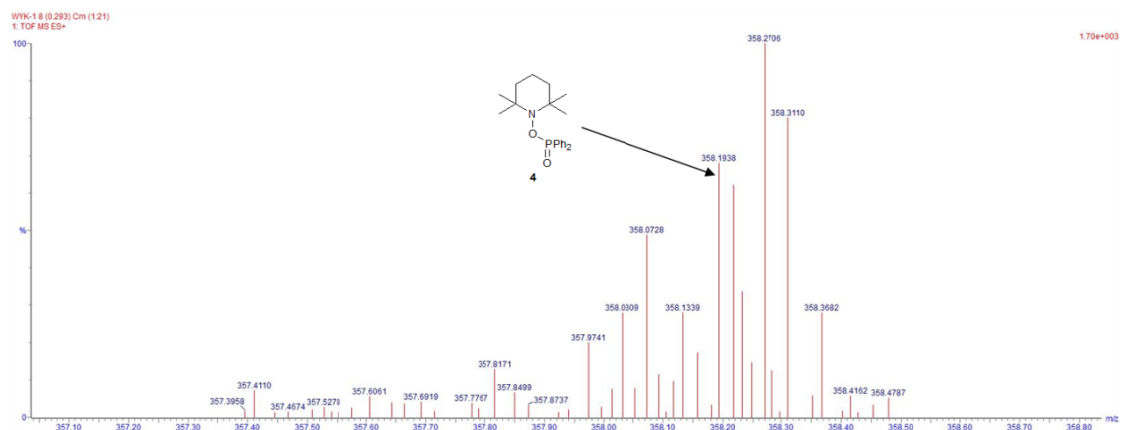

## NMR spectra for the products

### $^1\text{H}$ NMR of **3aa**

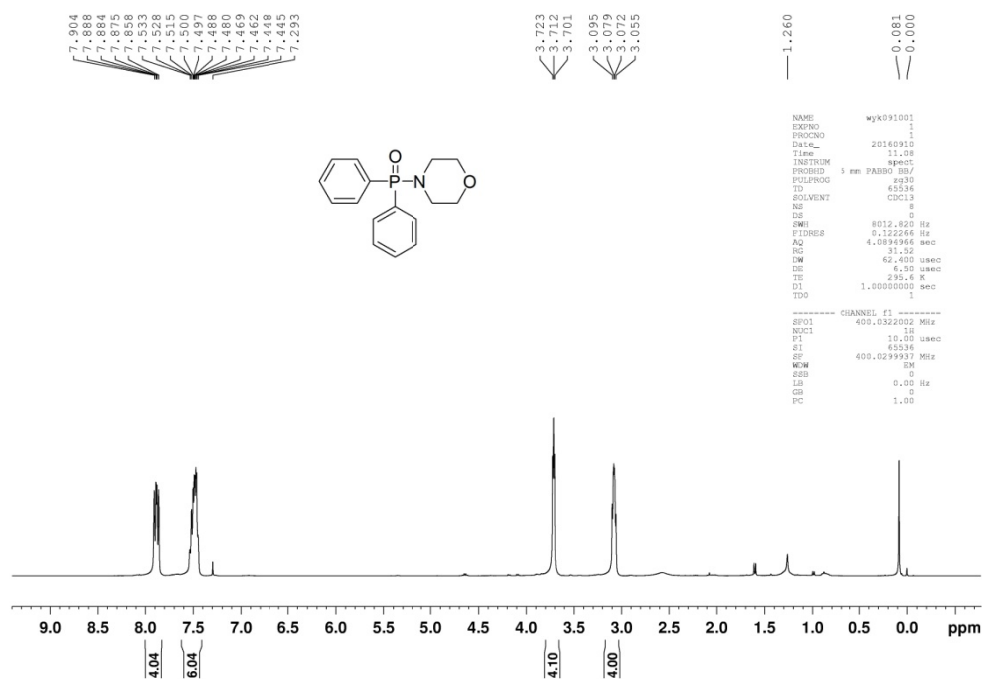

### $^{13}\text{C}$ NMR of **3aa**



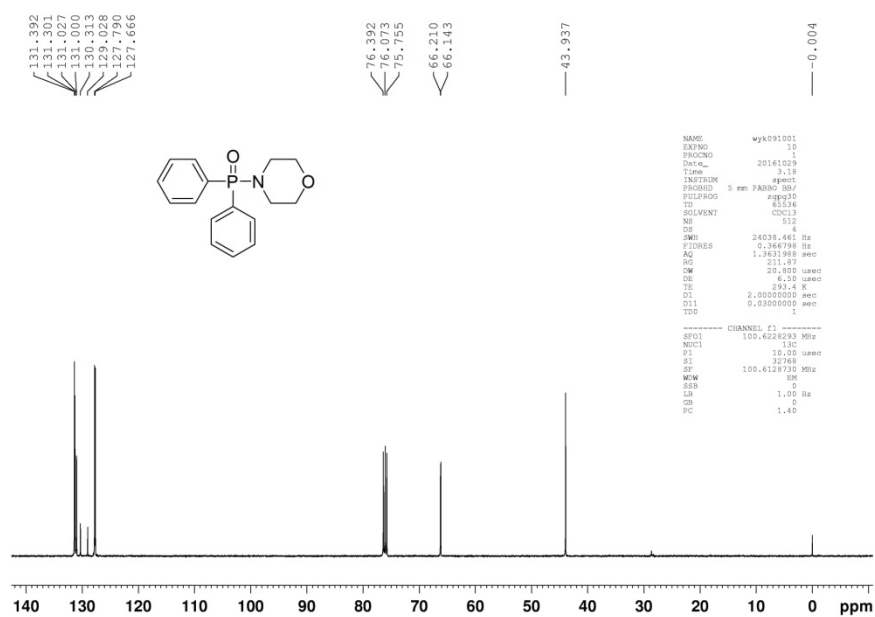

<sup>31</sup>P NMR of **3aa**

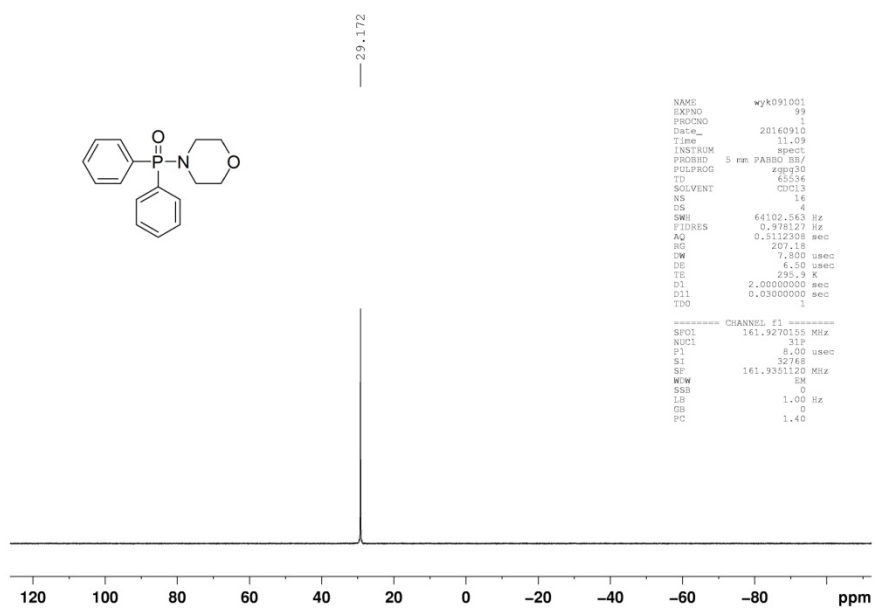

<sup>1</sup>H NMR of **3ab**

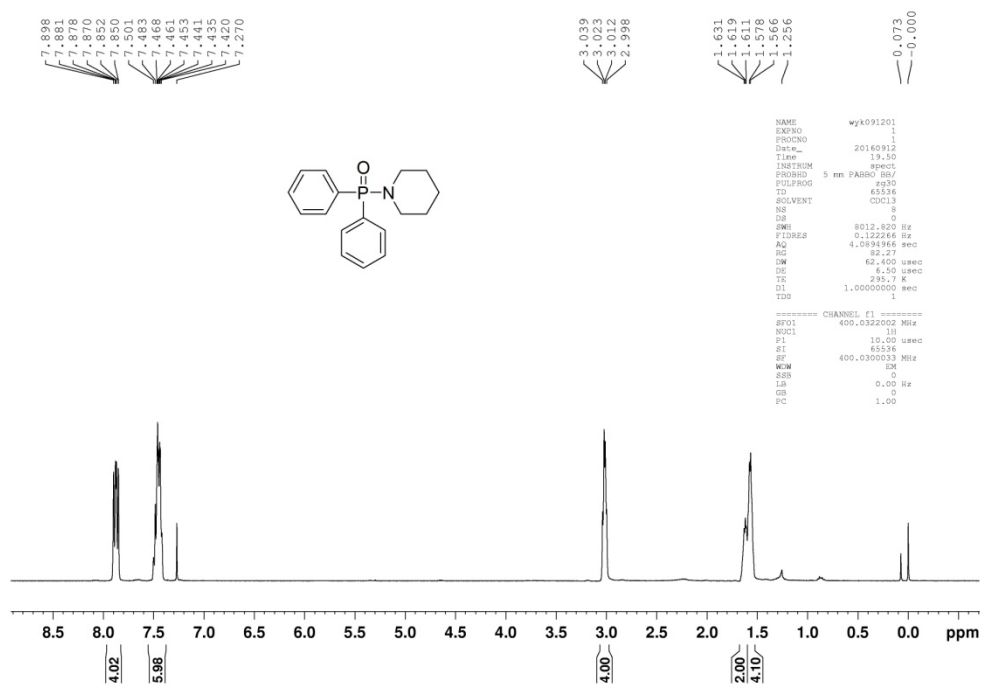

**<sup>13</sup>C NMR of 3ab**

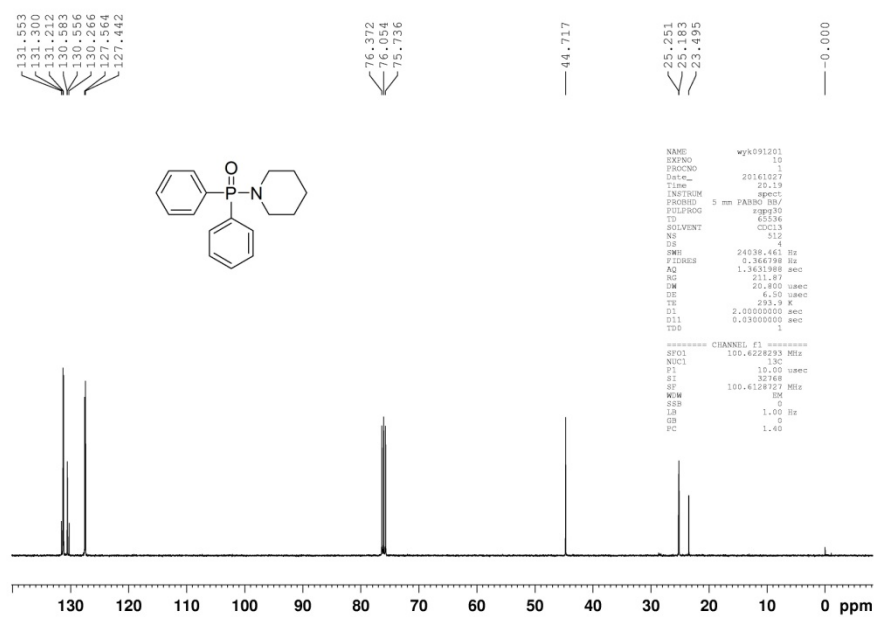

**<sup>31</sup>P NMR of 3ab**

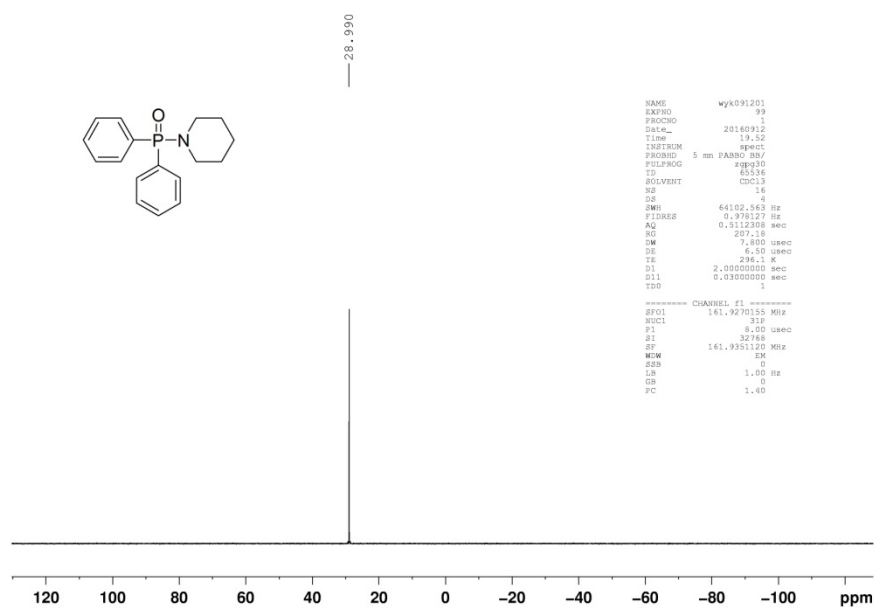

<sup>1</sup>H NMR of **3ac**

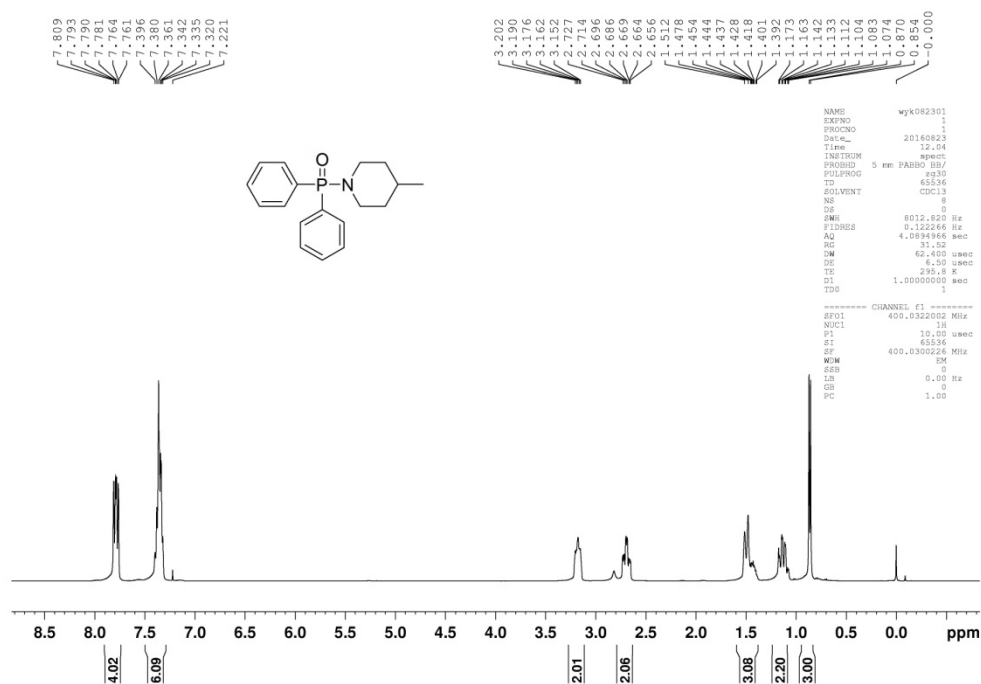

<sup>13</sup>C NMR of **3ac**

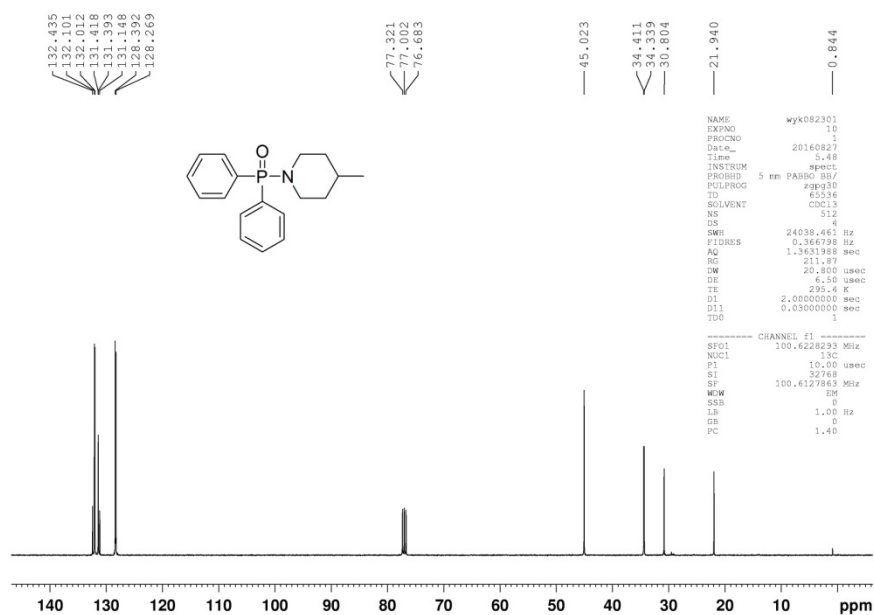

<sup>31</sup>P NMR of **3ac**

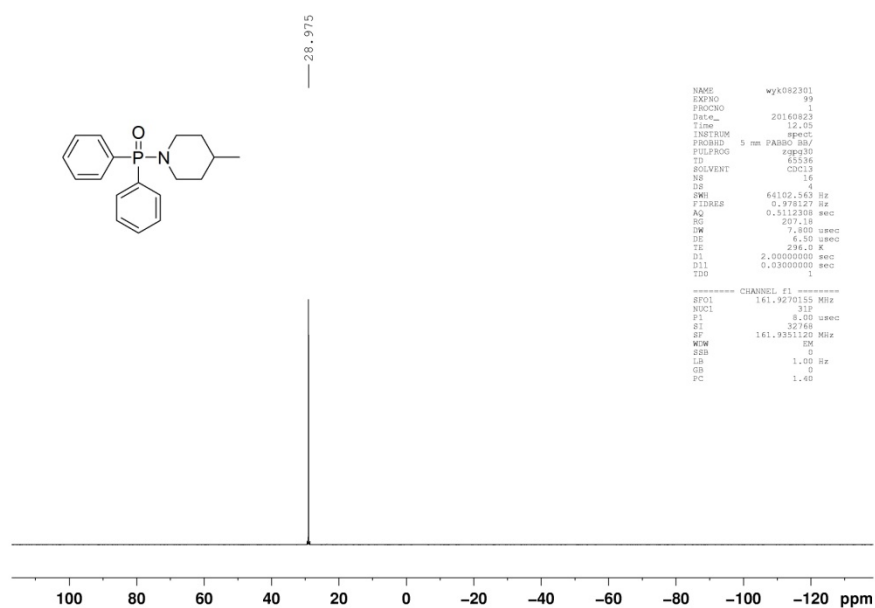

<sup>1</sup>H NMR of **3ad**

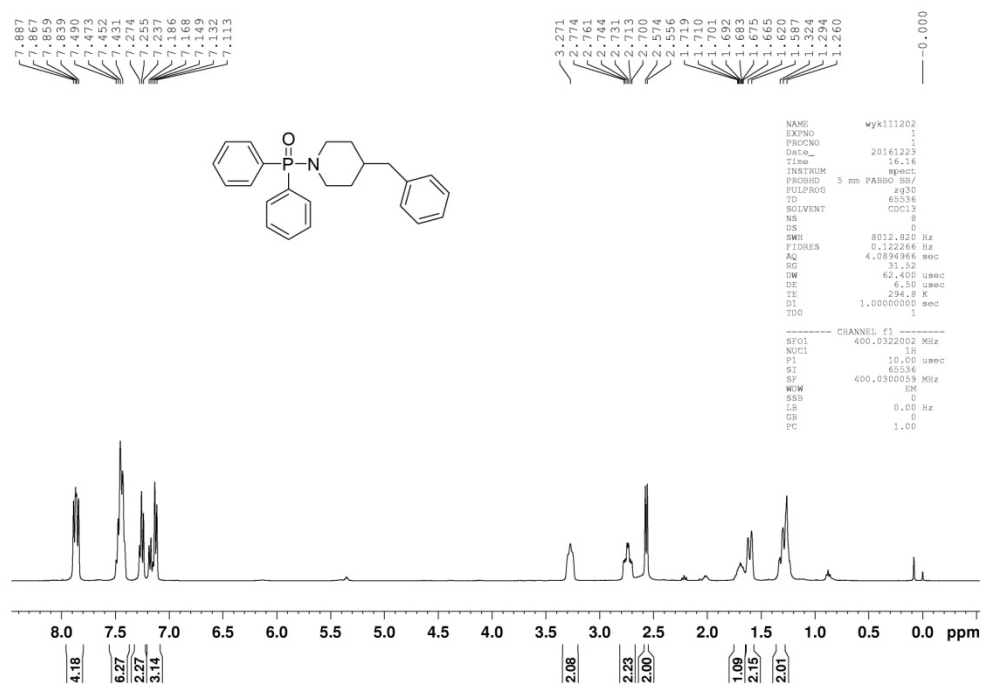

### <sup>13</sup>C NMR of **3ad**

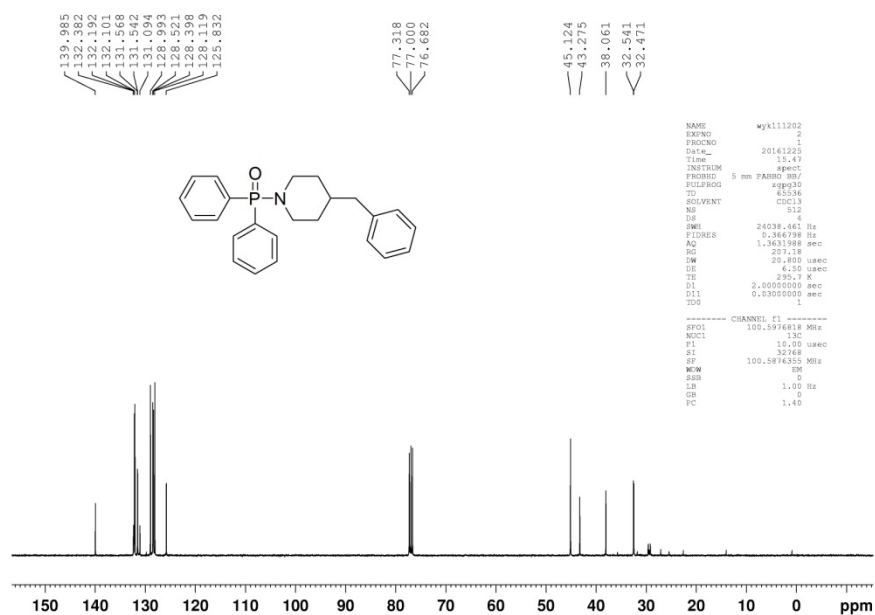

### <sup>31</sup>P NMR of **3ad**

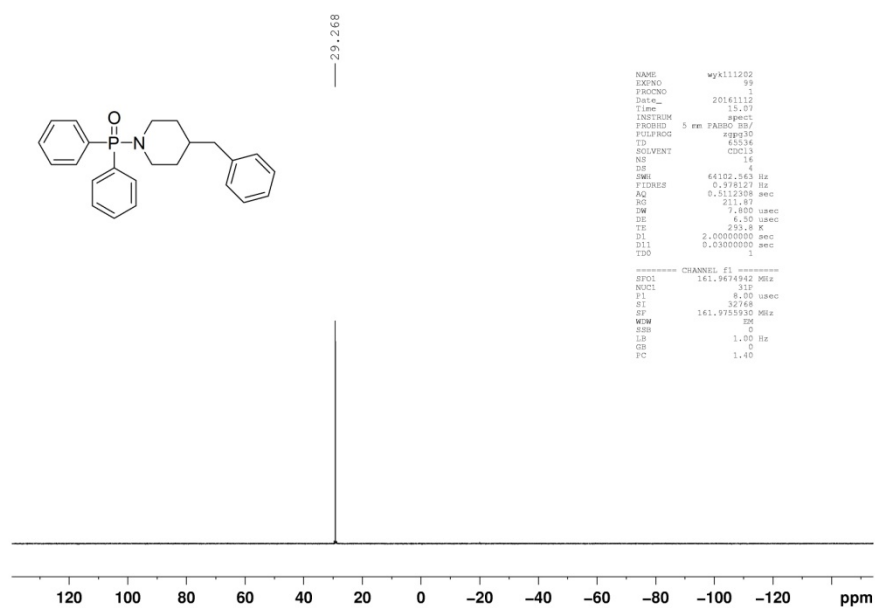

<sup>1</sup>H NMR of **3ae**

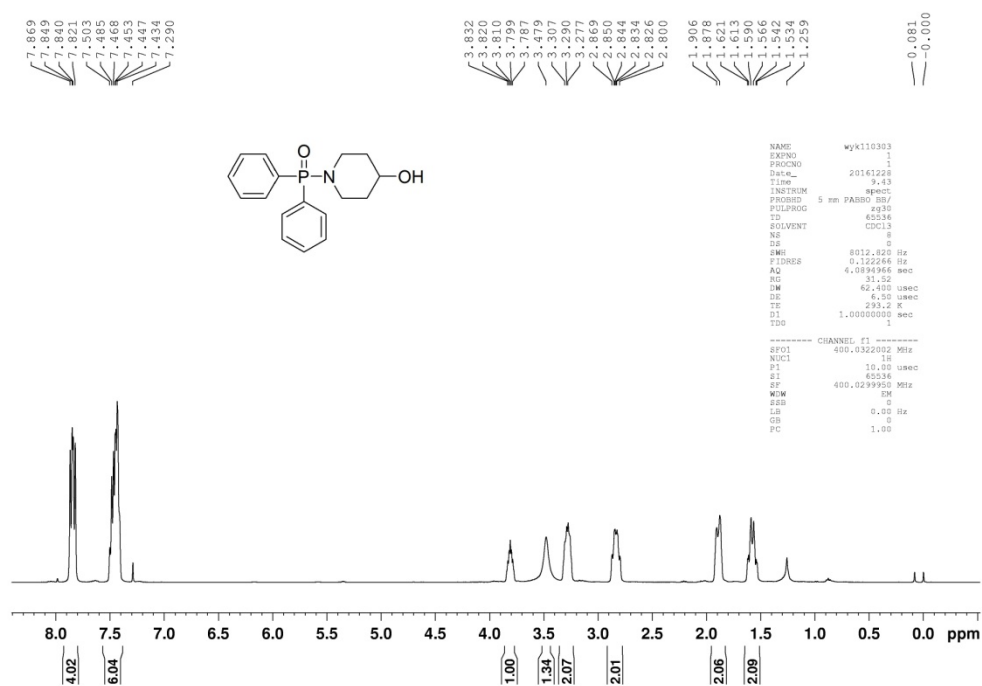

<sup>13</sup>C NMR of **3ae**

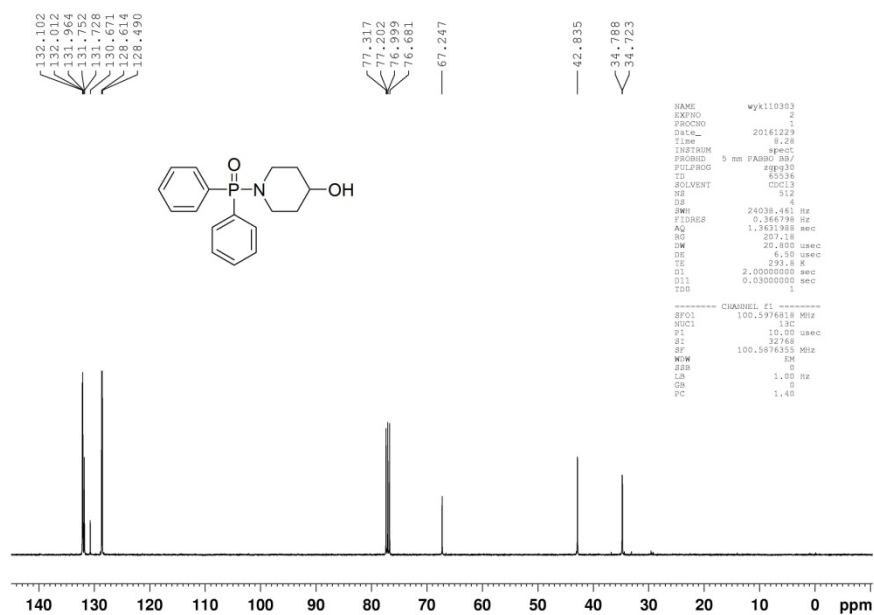

<sup>31</sup>P NMR of **3ae**

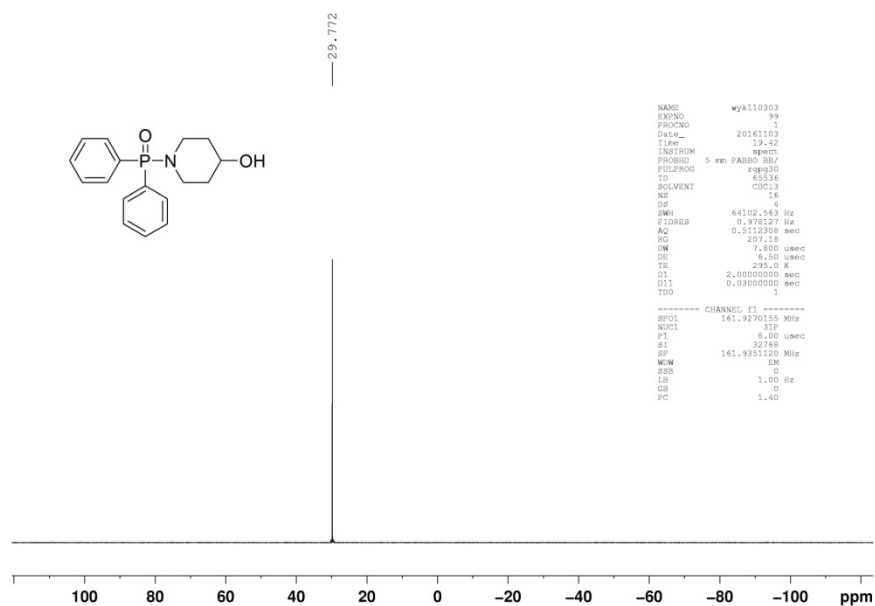

<sup>1</sup>H NMR of **3af**





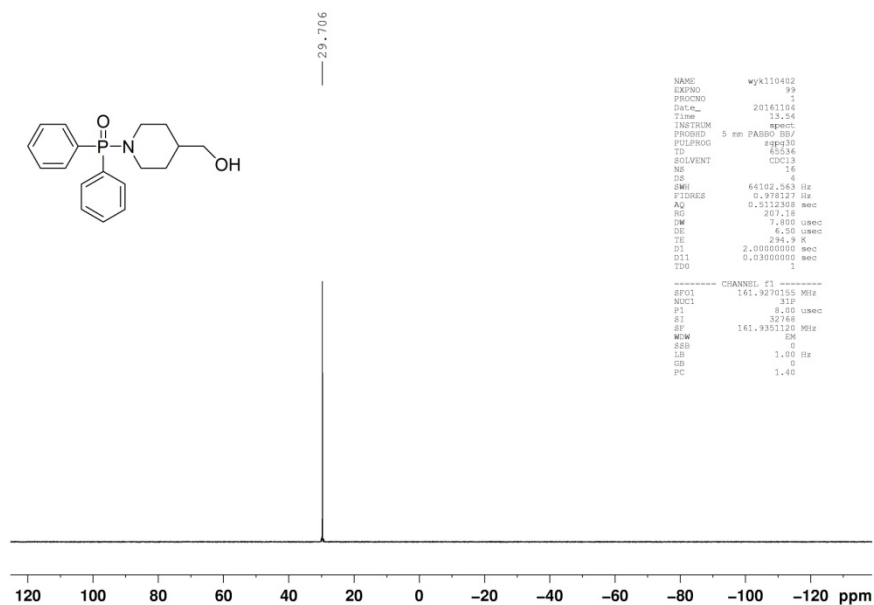

<sup>1</sup>H NMR of **3ag**

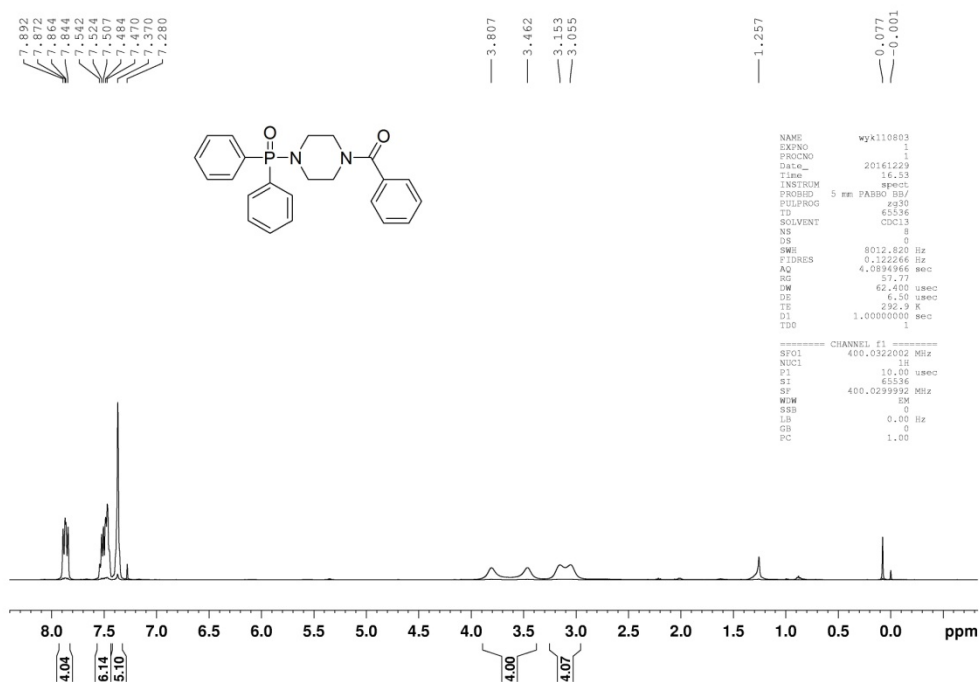

<sup>13</sup>C NMR of **3ag**

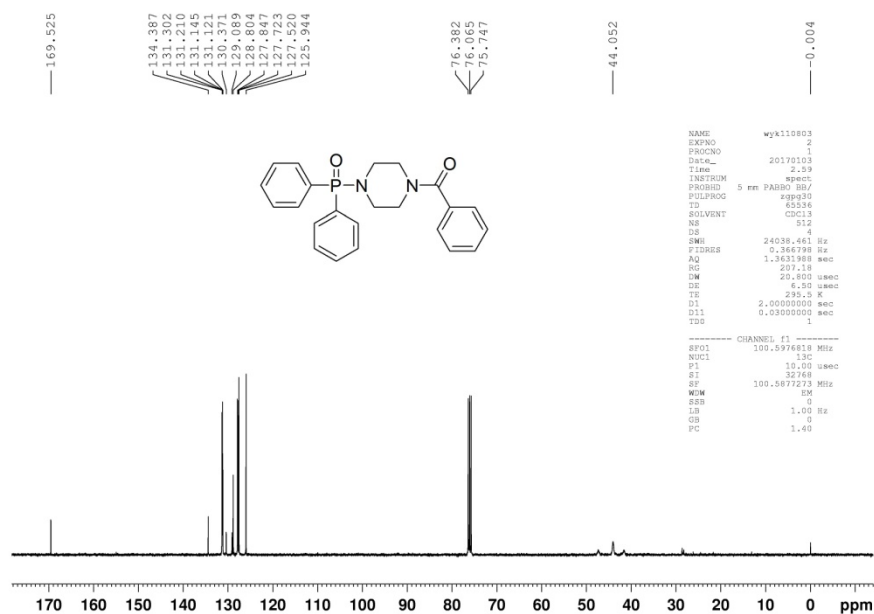

<sup>31</sup>P NMR of **3ag**

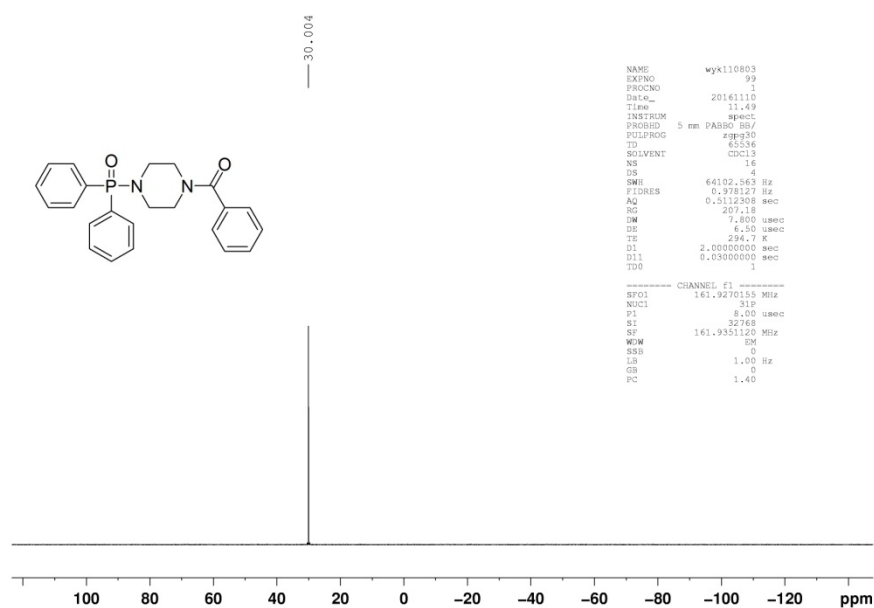

<sup>1</sup>H NMR of **3ah**

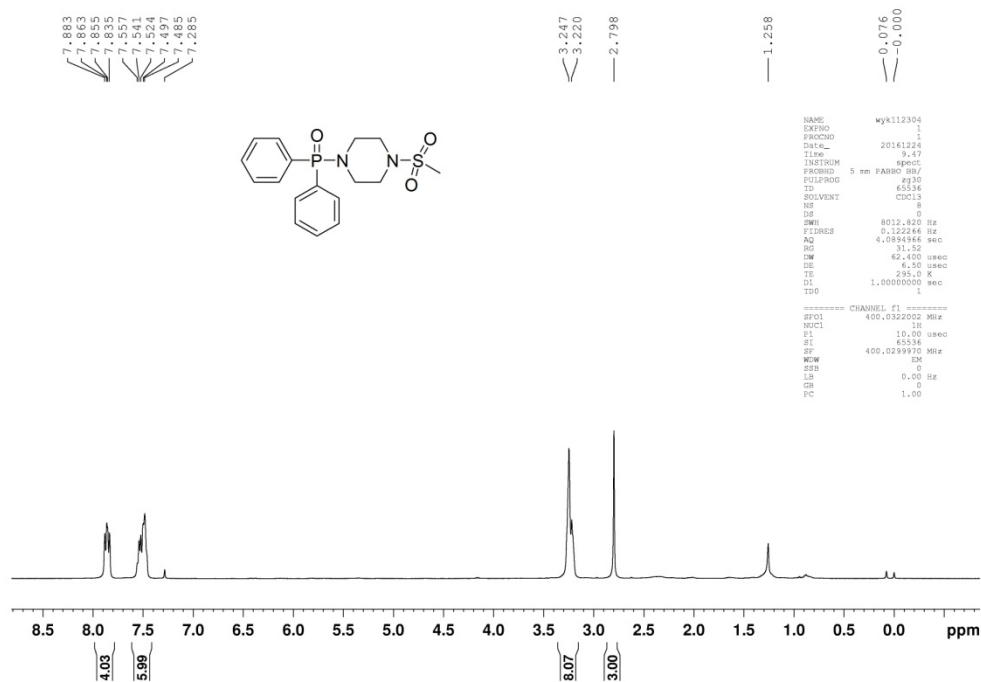

<sup>13</sup>C NMR of **3ah**

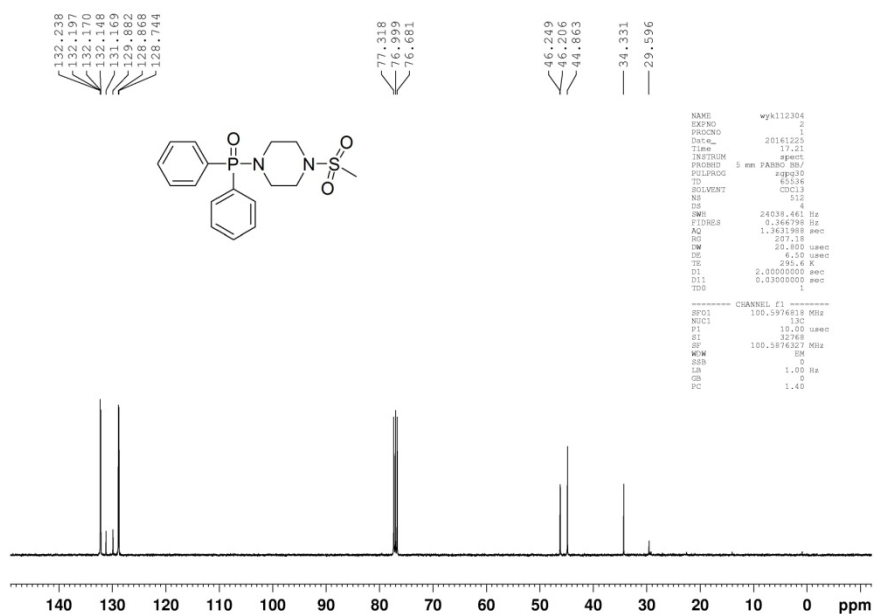

<sup>31</sup>P NMR of **3ah**

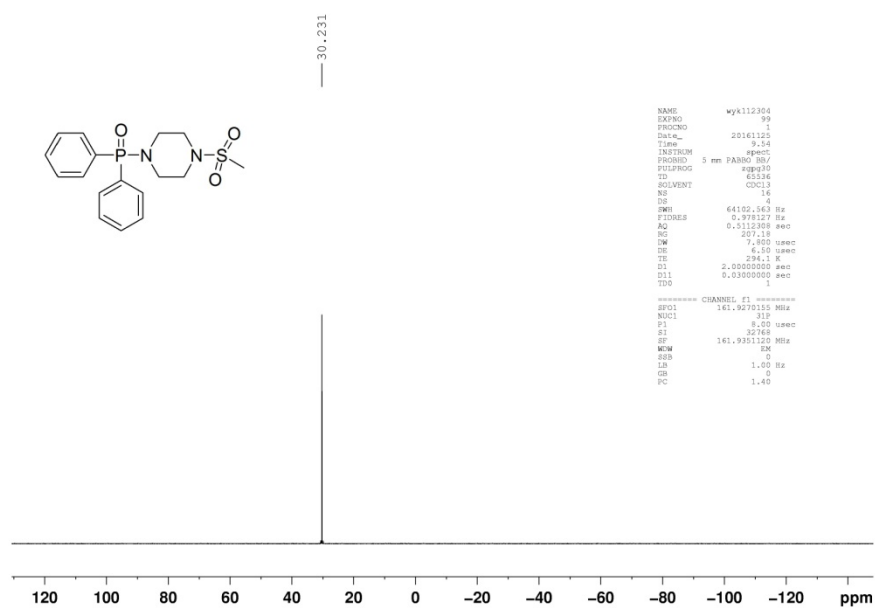

```

NAME      wyk112304
EXPNO     1
PROCNO    1
Date_     20161125
Time      9.34
INSTRUM    spect
PROBHD     5 mm F400
PULPROG    zgpg30
TD         65536
SOLVENT    CDCl3
NS         16
DS         4
SWH         44102.543 Hz
FIDRES     0.578527 Hz
AQ         0.5112308 sec
RG         327.18
RW         7.800 usec
DE         6.50 usec
TE         294.1 K
D1         2.0000000 sec
D11        0.0300000 sec
TD0        1

===== CHANNEL f1 =====
SFO1      161.9270155 MHz
NUC1       13C
P1         8.00 usec
RG         327.18
SF         161.9351120 MHz
WDW        EM
SSB         0
LB         1.60 Hz
GB         0
PC         1.60

```

# <sup>1</sup>H NMR of 3ai

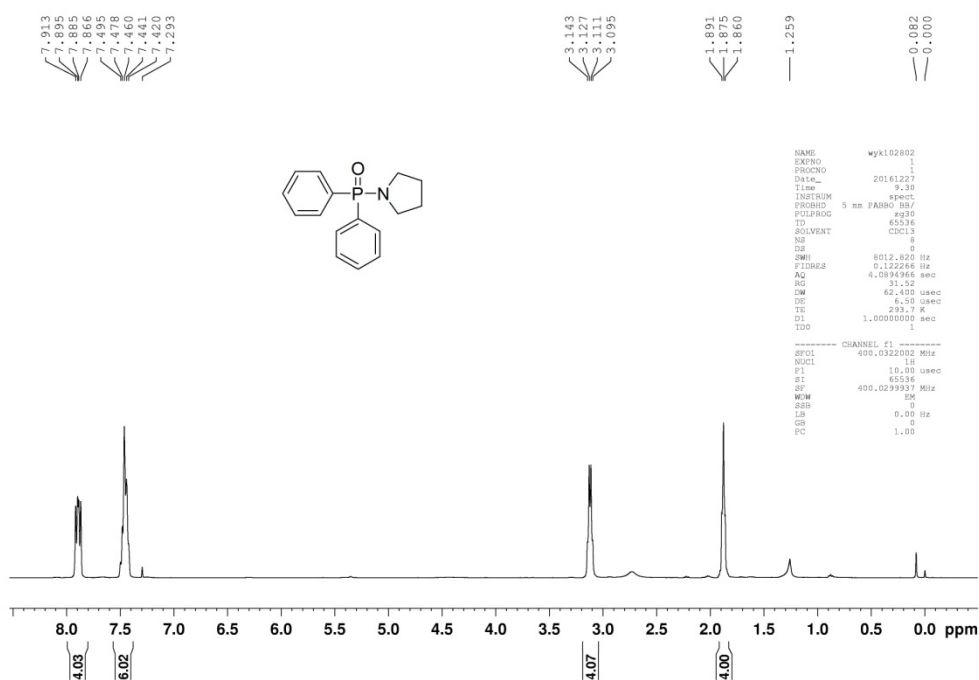

```

NAME      wyk102802
EXPNO     1
PROCNO    1
Date_     20161227
Time      9.30
INSTRUM    spect
PROBHD     5 mm F400
PULPROG    zgpg30
TD         65536
SOLVENT    CDCl3
NS         8
DS         0
SWH         8012.020 Hz
FIDRES     0.122266 Hz
AQ         6.0894966 sec
RG         31.52
RW         62.400 usec
DE         6.50 usec
TE         293.7 K
D1         1.0000000 sec
TD0        1

===== CHANNEL f1 =====
SFO1      400.0322002 MHz
NUC1       1H
P1         10.00 usec
RG         65536
SF         400.0299937 MHz
WDW        EM
SSB         0
LB         0.00 Hz
GB         0
PC         1.00

```

# <sup>13</sup>C NMR of 3ai

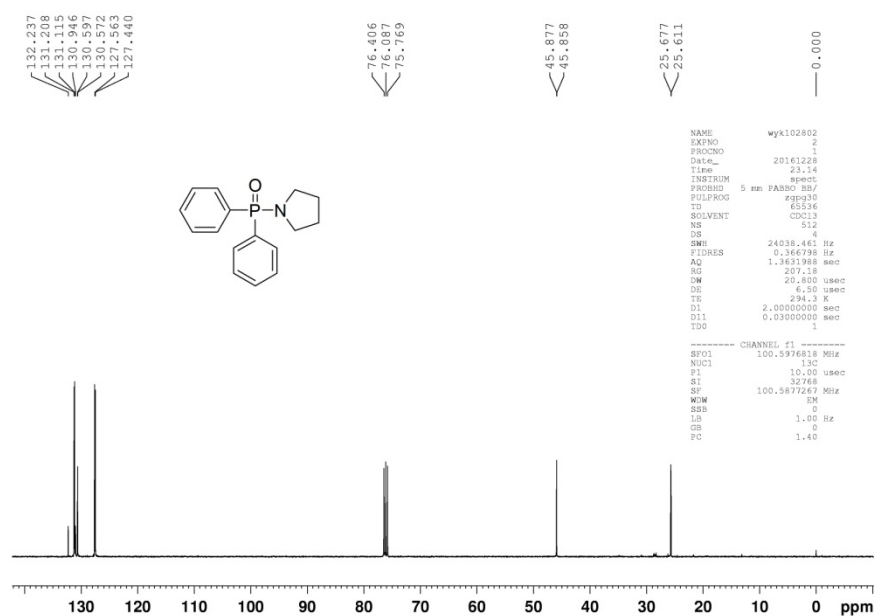

<sup>31</sup>P NMR of 3ai

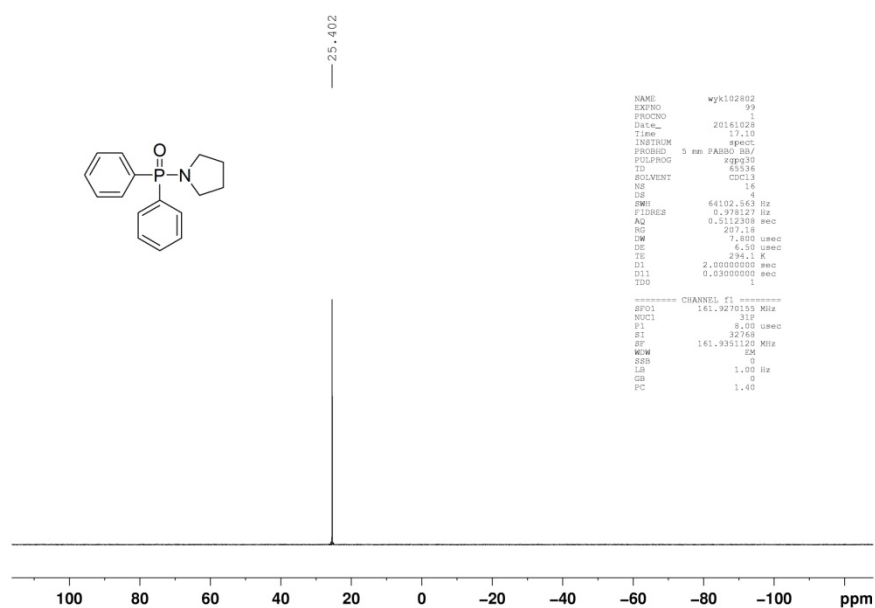

<sup>1</sup>H NMR of 3aj



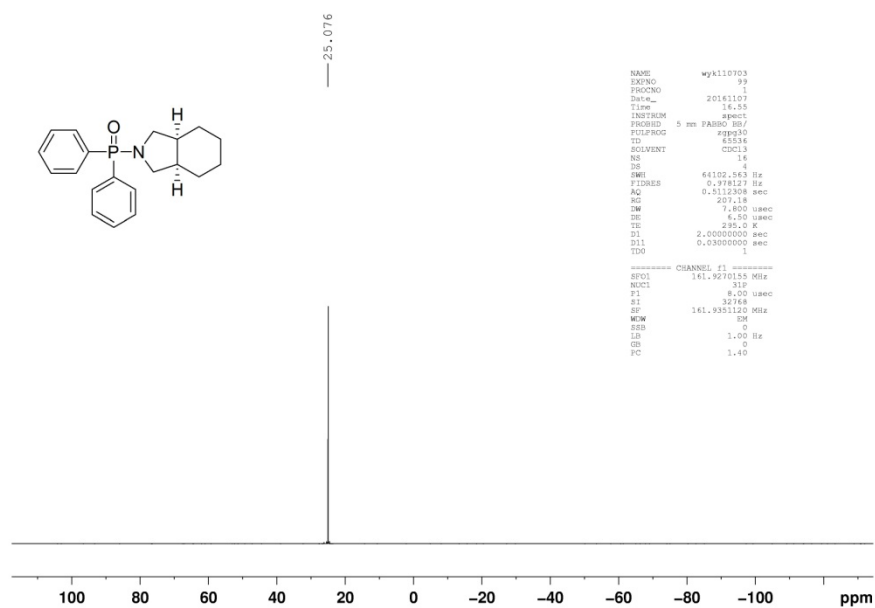

<sup>1</sup>H NMR of **3ak**

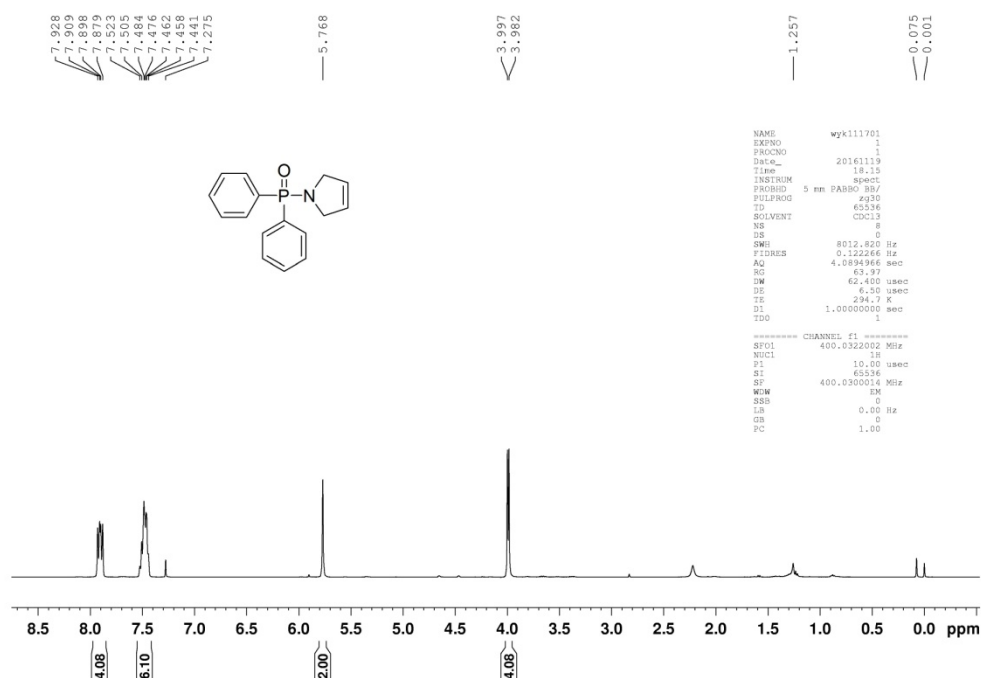

<sup>13</sup>C NMR of **3ak**

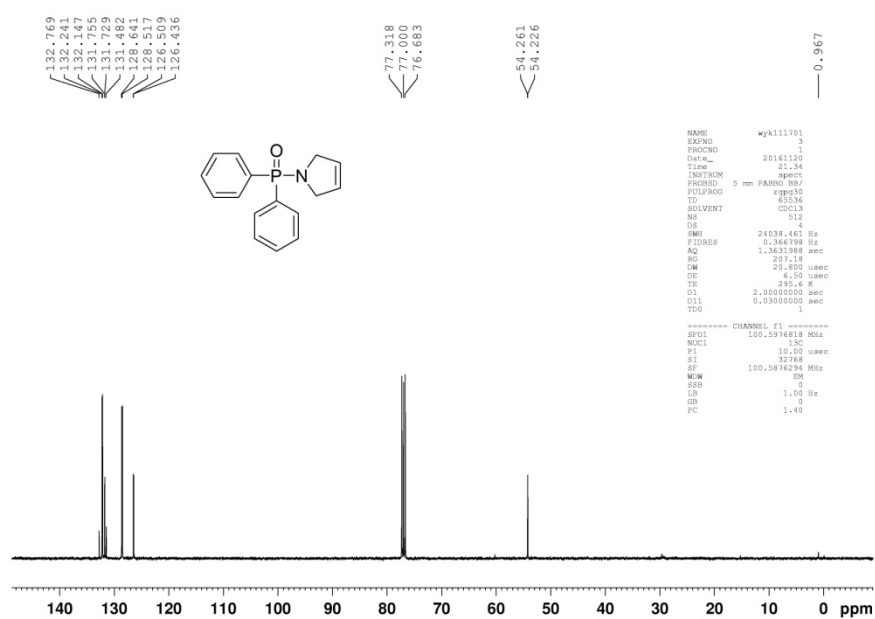

<sup>31</sup>P NMR of **3ak**

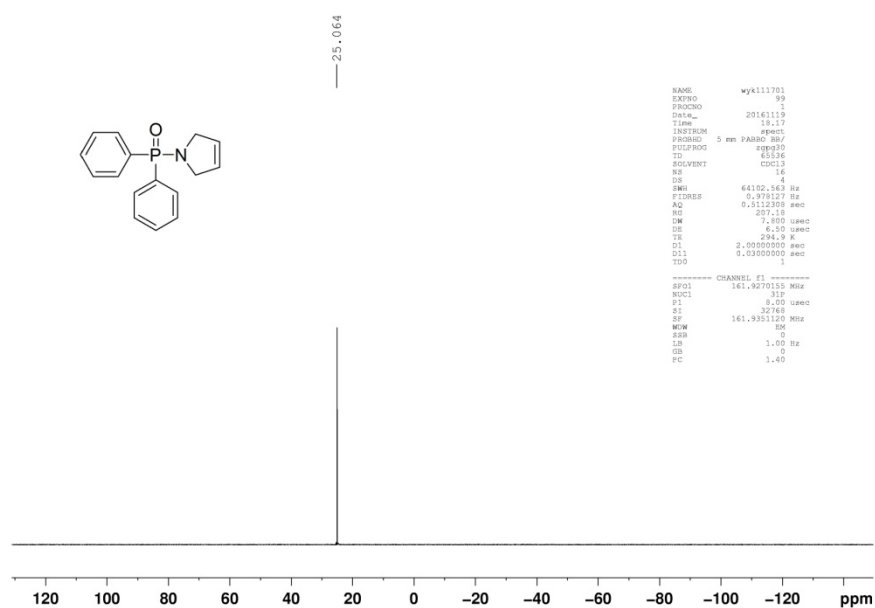

<sup>1</sup>H NMR of **3al**



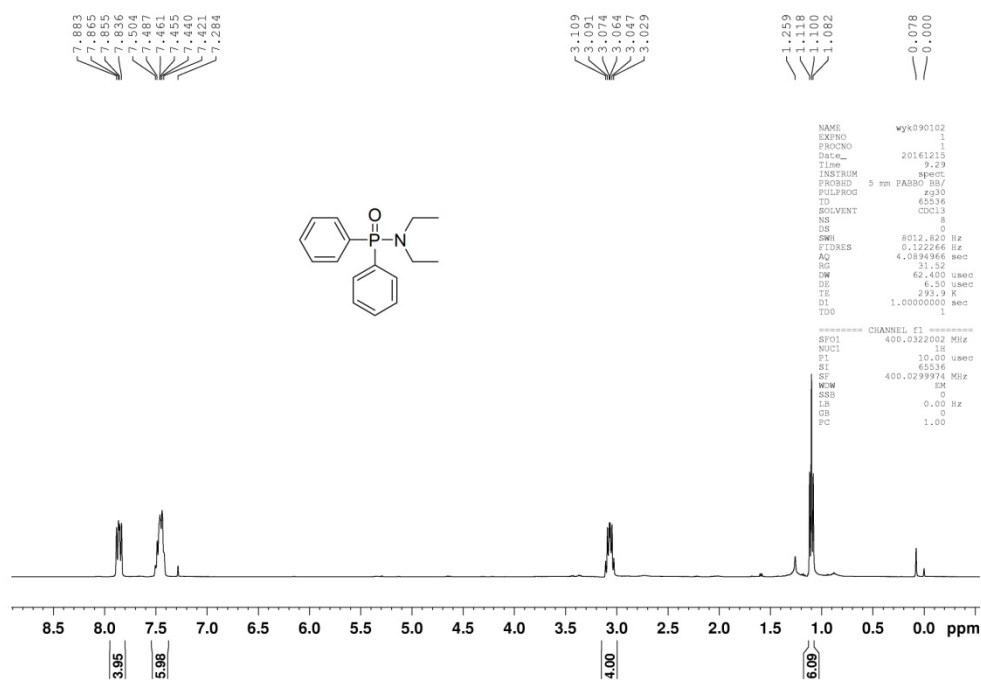

### <sup>13</sup>C NMR of **3al**

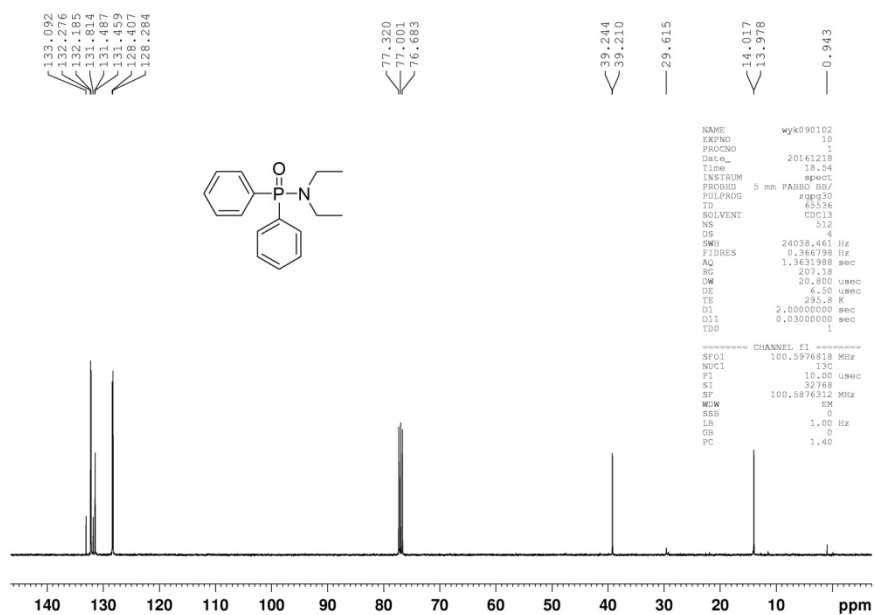

### <sup>31</sup>P NMR of **3al**

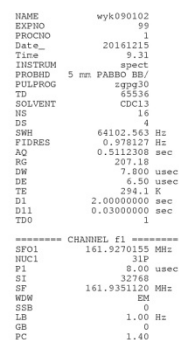

Chemical structure: CN(C1=CC=CC=C1)P(=O)(C2=CC=CC=C2)C3=CC=CC=C3

<sup>1</sup>H NMR spectrum (CDCl<sub>3</sub>) showing peaks at 9.55, 9.39, 9.36, 9.26, 9.10, 9.06, 8.96, 8.88, 8.85, 8.71, 8.66, 8.45, 8.53, 8.46, 8.30, 8.24, 8.21, 8.17, 8.07, 8.04, 8.01, 7.97, 7.94, 7.91, 7.87, 7.84, 7.81, 7.77, 7.74, 7.71, 7.67, 7.64, 7.61, 7.57, 7.54, 7.51, 7.47, 7.44, 7.41, 7.37, 7.34, 7.30, 7.27, 7.24, 7.21, 7.17, 7.14, 7.11, 7.07, 7.04, 7.01, 6.97, 6.94, 6.91, 6.87, 6.84, 6.81, 6.77, 6.74, 6.71, 6.67, 6.64, 6.61, 6.57, 6.54, 6.51, 6.47, 6.44, 6.41, 6.37, 6.34, 6.30, 6.27, 6.24, 6.21, 6.17, 6.14, 6.11, 6.07, 6.04, 6.01, 5.97, 5.94, 5.91, 5.87, 5.84, 5.81, 5.77, 5.74, 5.71, 5.67, 5.64, 5.61, 5.57, 5.54, 5.51, 5.47, 5.44, 5.41, 5.37, 5.34, 5.30, 5.27, 5.24, 5.21, 5.17, 5.14, 5.11, 5.07, 5.04, 5.01, 4.97, 4.94, 4.91, 4.87, 4.84, 4.81, 4.77, 4.74, 4.71, 4.67, 4.64, 4.61, 4.57, 4.54, 4.51, 4.47, 4.44, 4.41, 4.37, 4.34, 4.30, 4.27, 4.24, 4.21, 4.17, 4.14, 4.11, 4.07, 4.04, 4.01, 3.97, 3.94, 3.91, 3.87, 3.84, 3.81, 3.77, 3.74, 3.71, 3.67, 3.64, 3.61, 3.57, 3.54, 3.51, 3.47, 3.44, 3.41, 3.37, 3.34, 3.30, 3.27, 3.24, 3.21, 3.17, 3.14, 3.11, 3.07, 3.04, 3.01, 2.97, 2.94, 2.91, 2.87, 2.84, 2.81, 2.77, 2.74, 2.71, 2.67, 2.64, 2.61, 2.57, 2.54, 2.51, 2.47, 2.44, 2.41, 2.37, 2.34, 2.30, 2.27, 2.24, 2.21, 2.17, 2.14, 2.11, 2.07, 2.04, 2.01, 1.97, 1.94, 1.91, 1.87, 1.84, 1.81, 1.77, 1.74, 1.71, 1.67, 1.64, 1.61, 1.57, 1.54, 1.51, 1.47, 1.44, 1.41, 1.37, 1.34, 1.30, 1.27, 1.24, 1.21, 1.17, 1.14, 1.11, 1.07, 1.04, 1.01, 0.97, 0.94, 0.91, 0.87, 0.84, 0.81, 0.77, 0.74, 0.71, 0.67, 0.64, 0.61, 0.57, 0.54, 0.51, 0.47, 0.44, 0.41, 0.37, 0.34, 0.30, 0.27, 0.24, 0.21, 0.17, 0.14, 0.11, 0.07, 0.04, 0.01, 0.00 ppm.

Integration values: 4.04, 6.08, 4.02, 1.18, 2.03, 3.00, 3.00, 1.263.

30

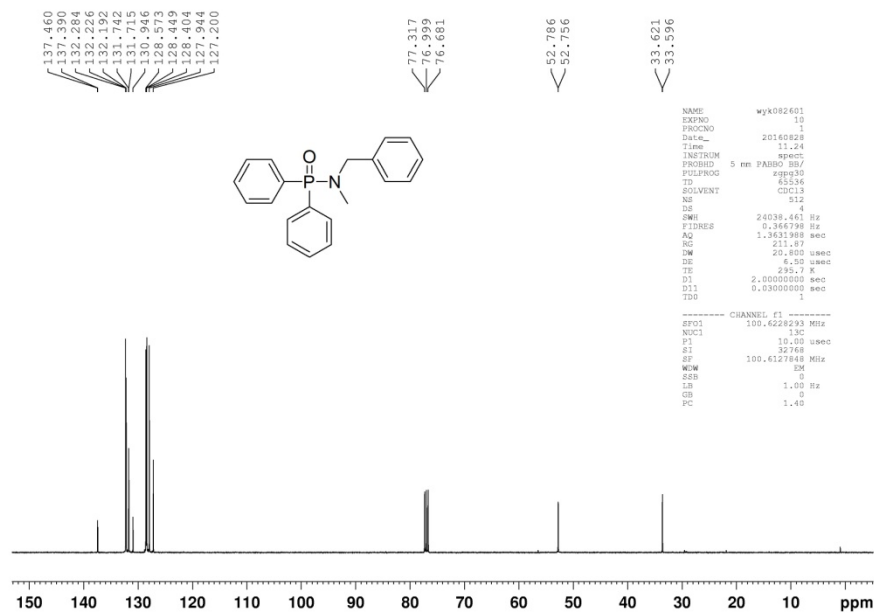

<sup>31</sup>P NMR of **3am**

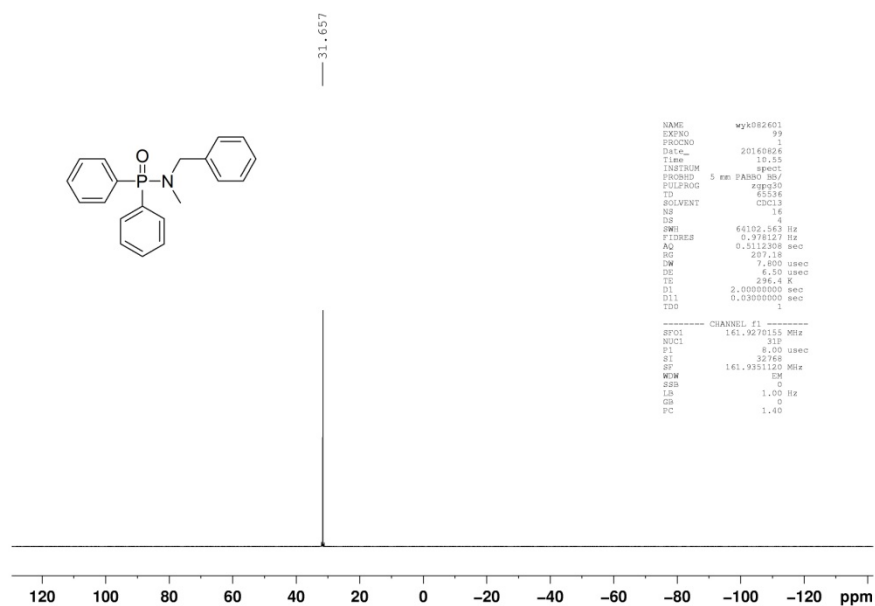

<sup>1</sup>H NMR of **3ba**

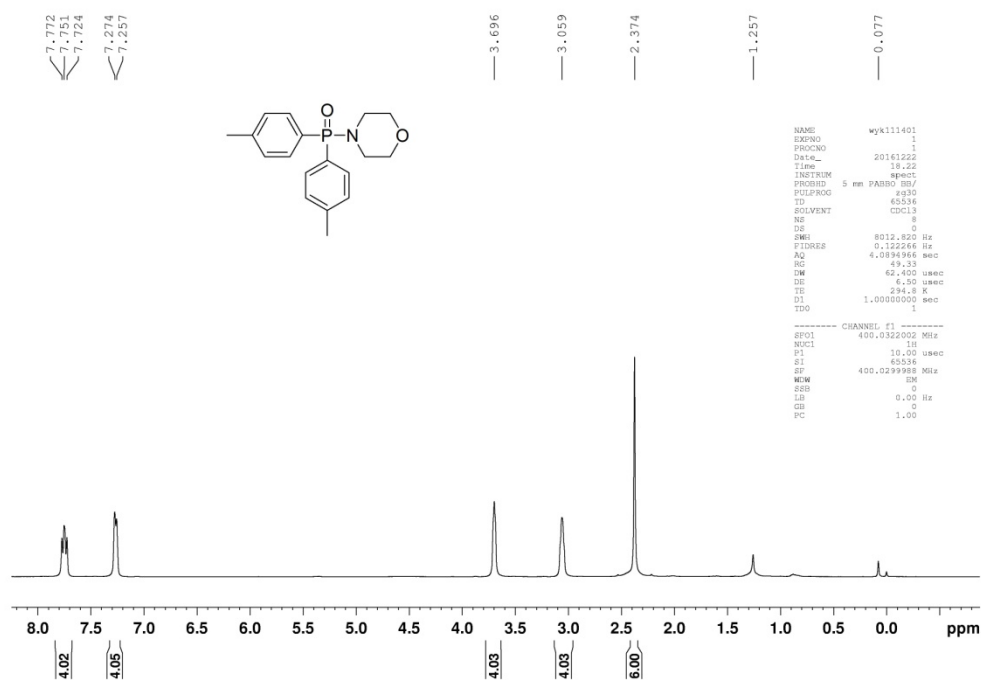

<sup>13</sup>C NMR of **3ba**

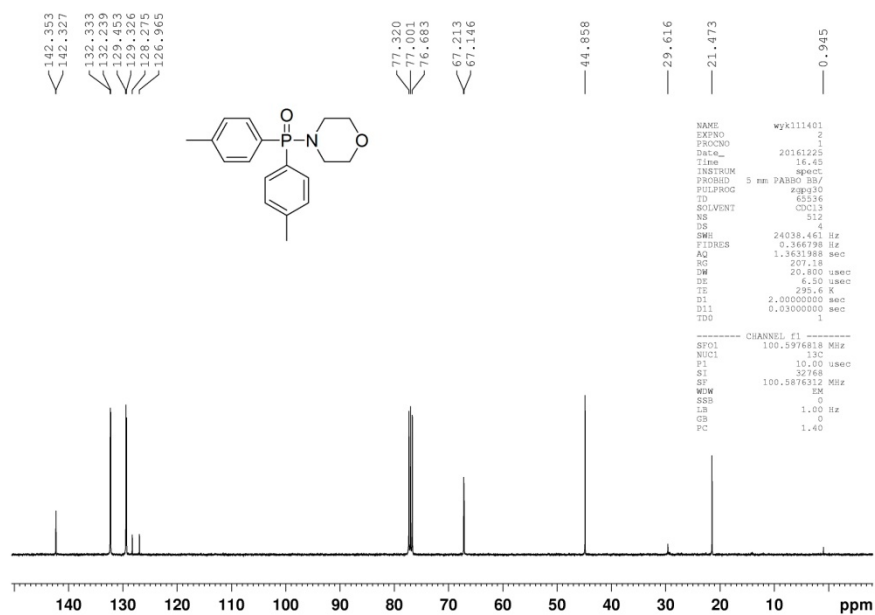

<sup>31</sup>P NMR of **3ba**

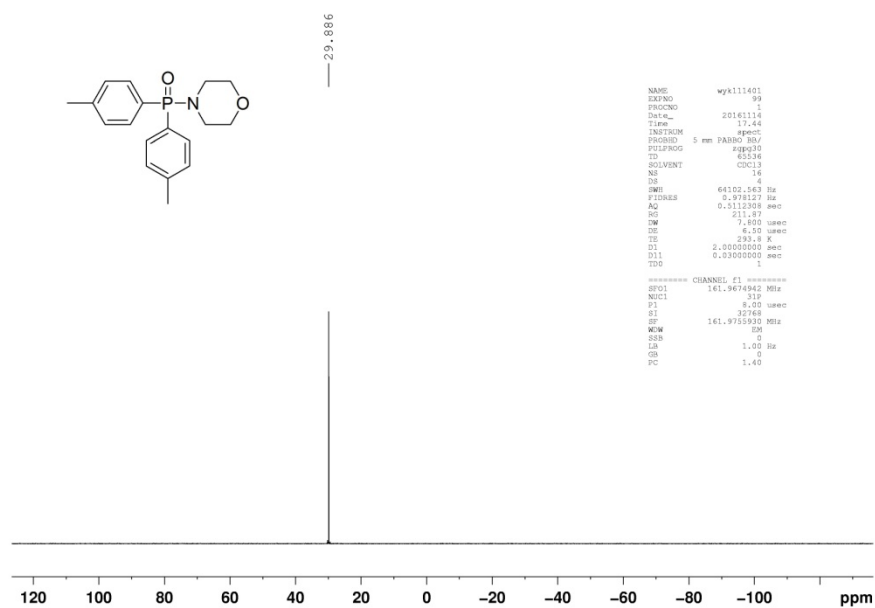

<sup>1</sup>H NMR of 3a

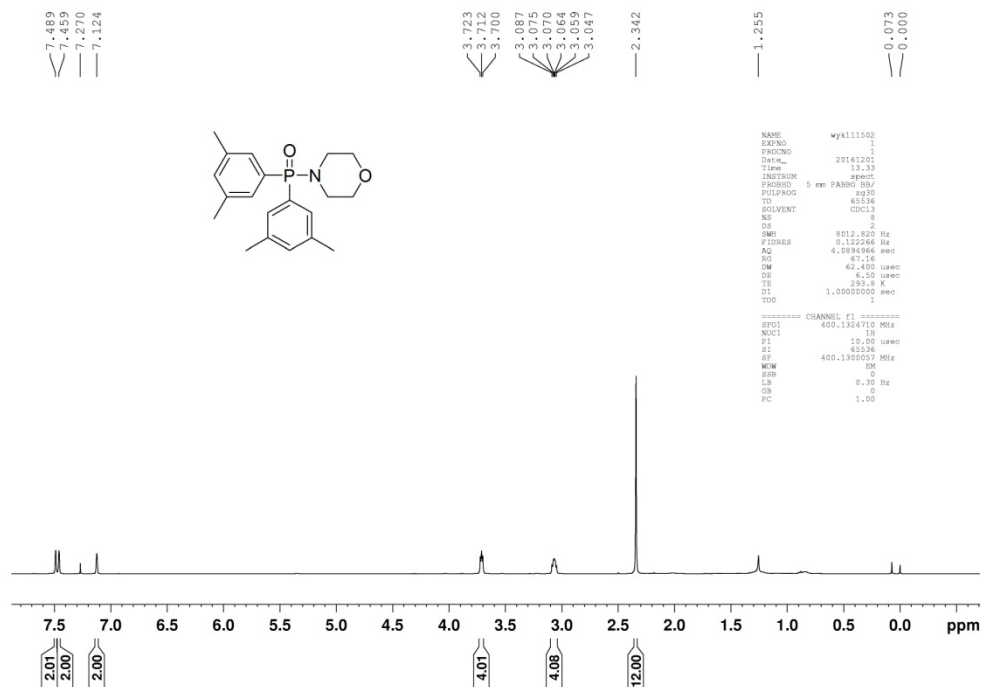

<sup>13</sup>C NMR of 3a

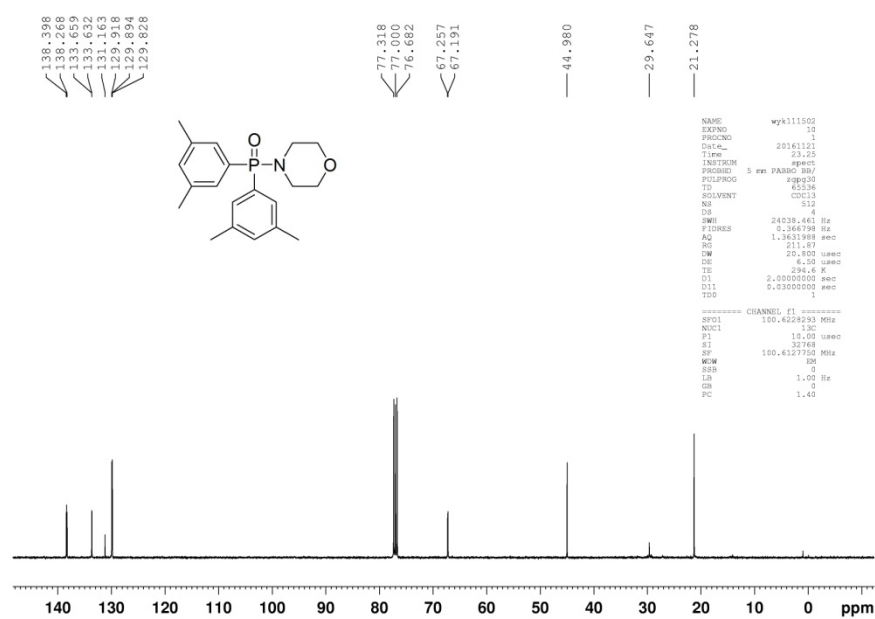

<sup>31</sup>P NMR of **3ca**

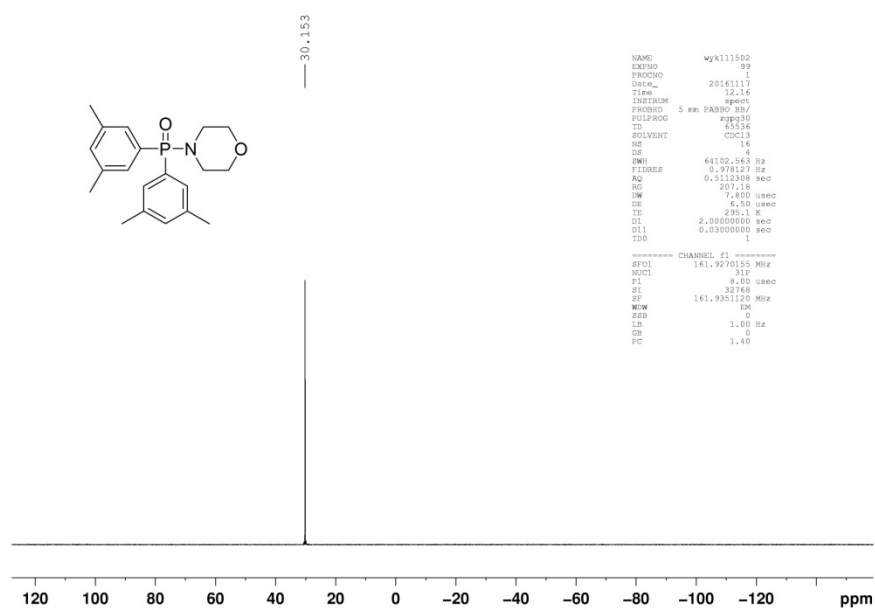

<sup>1</sup>H NMR of **3da**

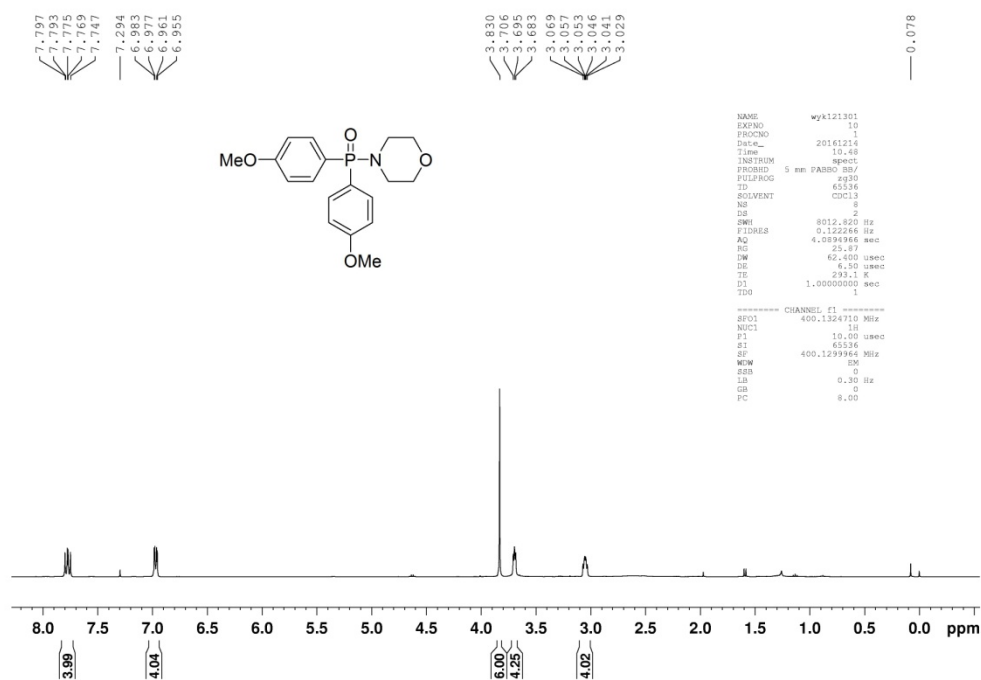

<sup>13</sup>C NMR of **3da**

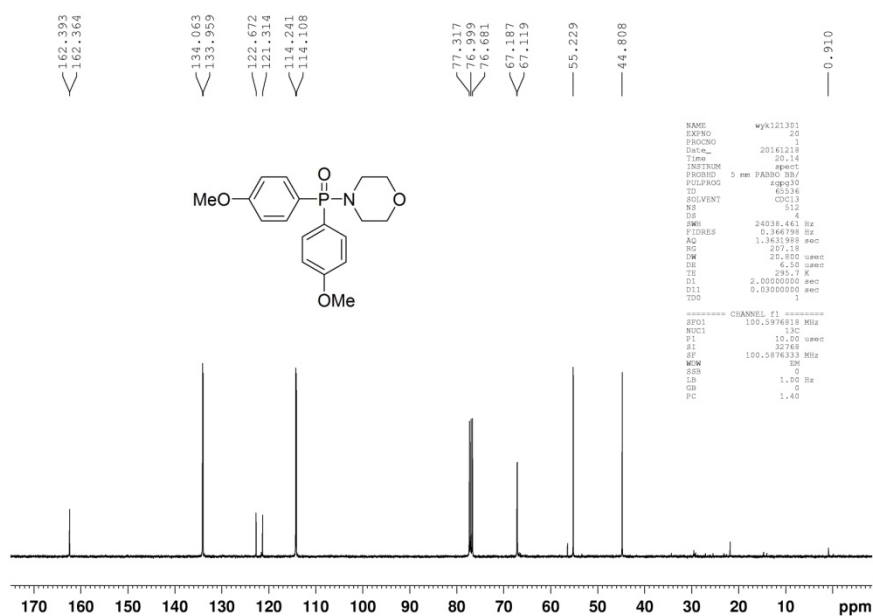

<sup>31</sup>P NMR of **3da**

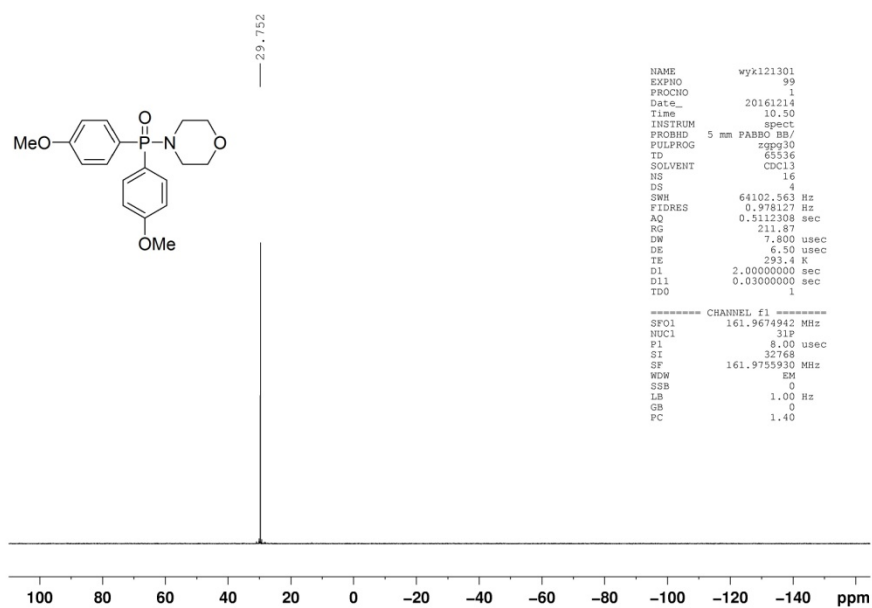

# <sup>1</sup>H NMR of 3ea

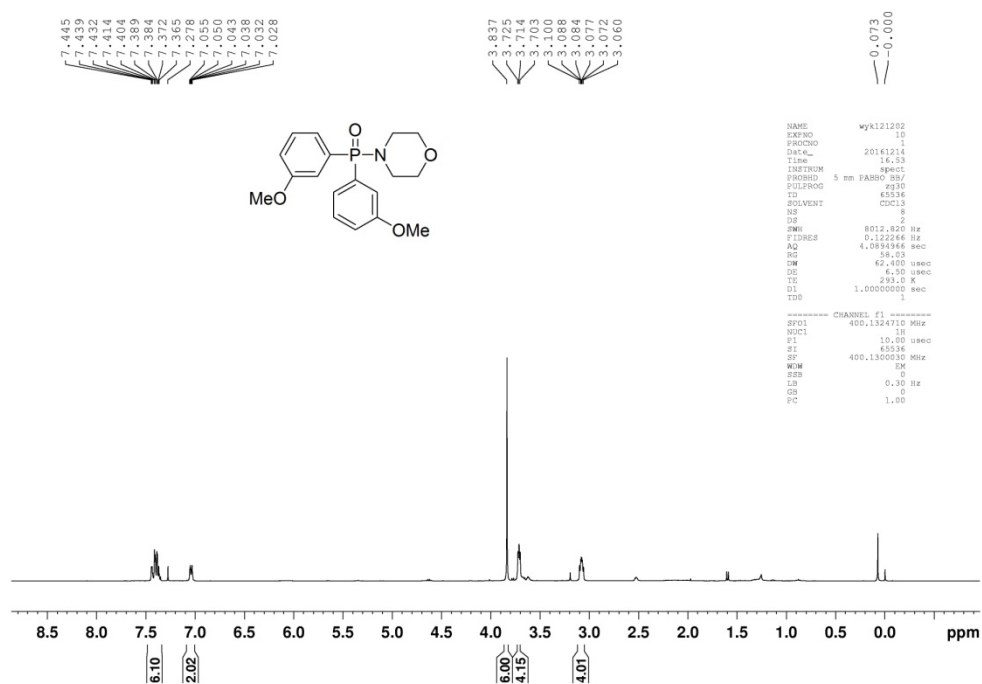

# <sup>13</sup>C NMR of 3ea





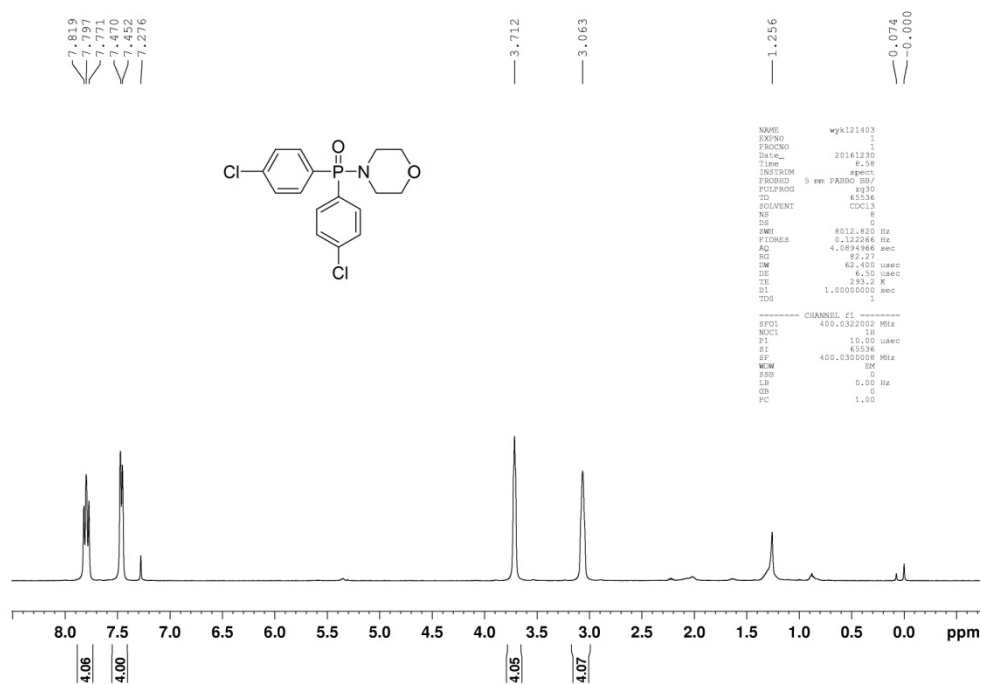

<sup>13</sup>C NMR of **3fa**

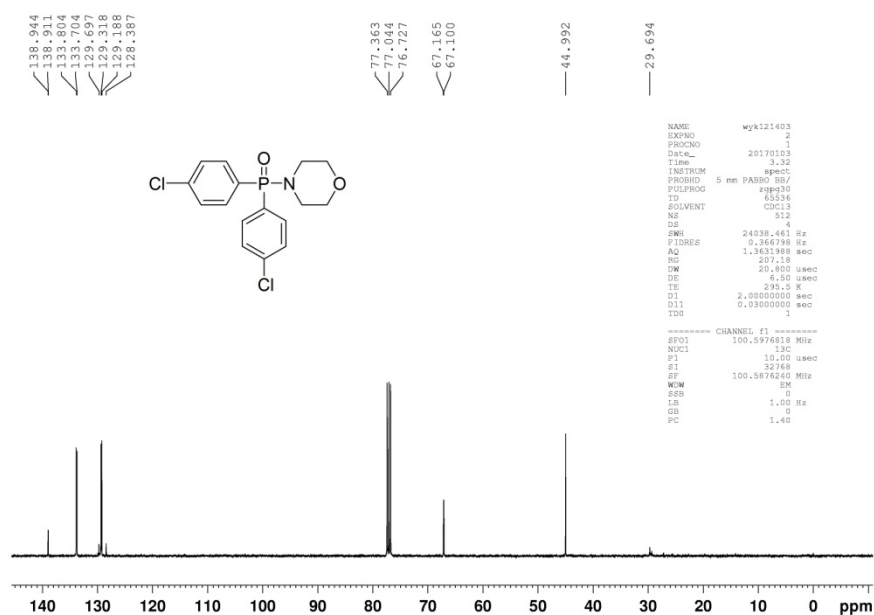

<sup>31</sup>P NMR of **3fa**

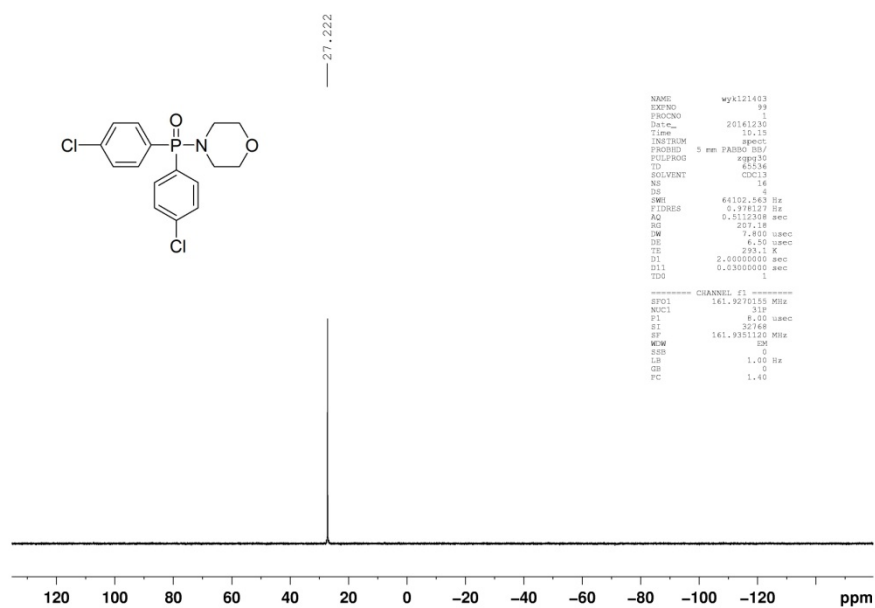

```

NAME      wyk121403
EXPNO     1
PROCNO    1
Date_     20141230
Time      10.15
INSTRUM   spect
PROBHD    5 mm PABBO BB/
PULPROG   zgpg30
TD         65536
SOLVENT   CDCl3
NS         16
DS         4
SWH        64102.563 Hz
FIDRES     0.978127 Hz
AQ         0.511238 sec
RG         207.18
RW         1.850 usec
DE         6.50 usec
TE         293.1 K
D1         2.0000000 sec
d11        0.0300000 sec
TD0        1
===== CHANNEL f1 =====
SFO1      161.8270150 MHz
NUC1       31P
P1         8.50 usec
PT         32488
SF         161.9351120 MHz
WDW        EM
SSB        0
LB         1.00 Hz
GB         0
PC         1.40

```

# <sup>1</sup>H NMR of 3ga

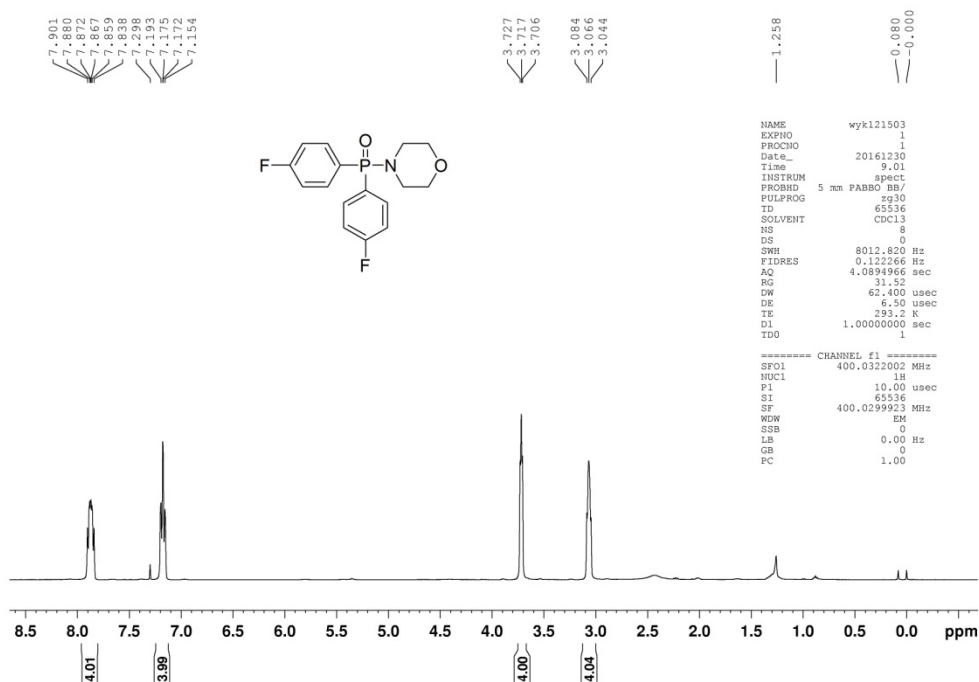

```

NAME      wyk121503
EXPNO     1
PROCNO    1
Date_     20161230
Time      9.01
INSTRUM   spect
PROBHD    5 mm PABBO BB/
PULPROG   zg30
TD         65536
SOLVENT   CDCl3
NS         8
DS         0
SWH        8012.820 Hz
FIDRES     0.122266 Hz
AQ         4.0894966 sec
RG         31.52
DW         62.400 usec
DE         6.50 usec
TE         293.2 K
D1         1.0000000 sec
TD0        1
===== CHANNEL f1 =====
SFO1      400.0322002 MHz
NUC1       1H
P1         10.00 usec
PT         65536
SF         400.0299923 MHz
WDW        EM
SSB        0
LB         0.00 Hz
GB         0
PC         1.00

```

# <sup>13</sup>C NMR of 3ga

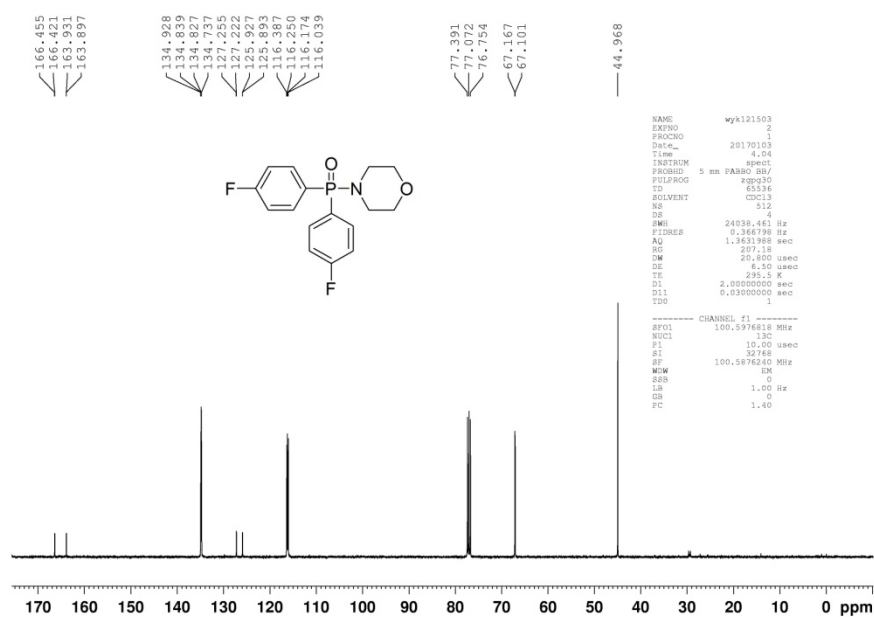

<sup>31</sup>P NMR of **3ga**

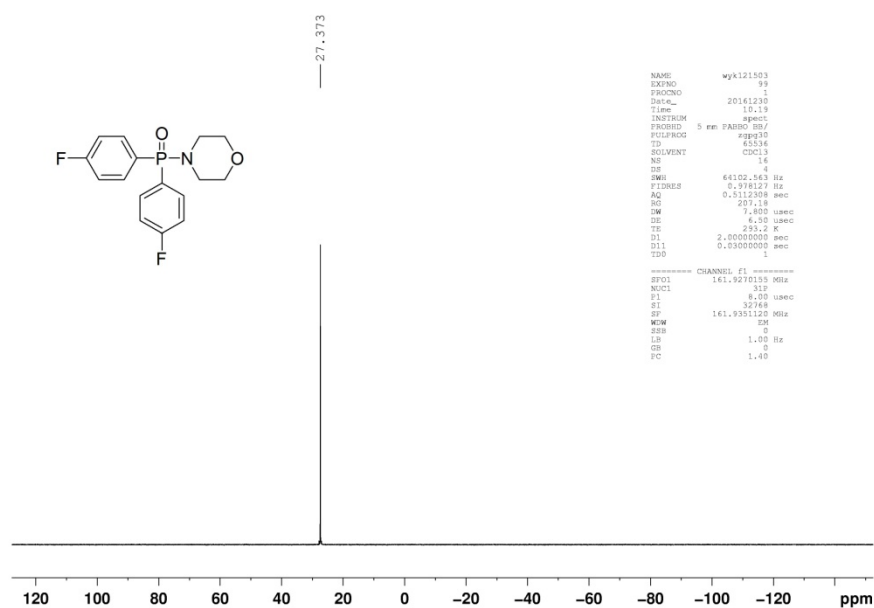

<sup>1</sup>H NMR of **3ha**

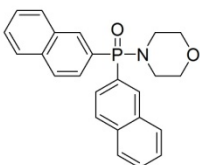

```
***** CHANNEL f1 *****
SFO1      400.0322002 MHz
NUC1              1H
P1              10.00 usec
SI              65536
SF      400.0300049 MHz
WDW              EM
SSB              0
LB              0.00 Hz
GB              0
PC              1.00
```

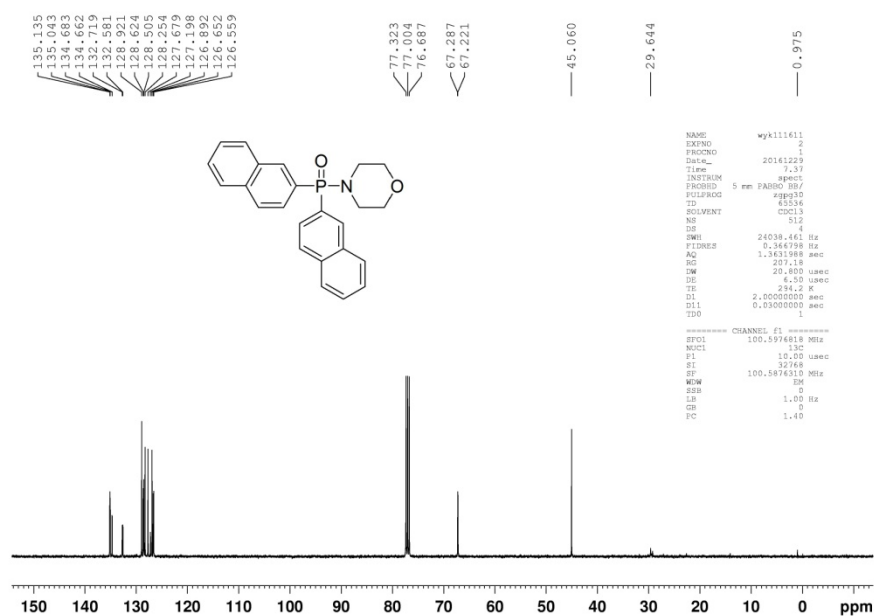

```

          CHANNEL f1
SF01      100.5976818 MHz
NUC1      13C
F1         10.00 usec
SI         32768
SF         100.5876310 MHz
WDW        EM
SSB        0
LB         1.00 Hz
GB         0
PC         1.40

```

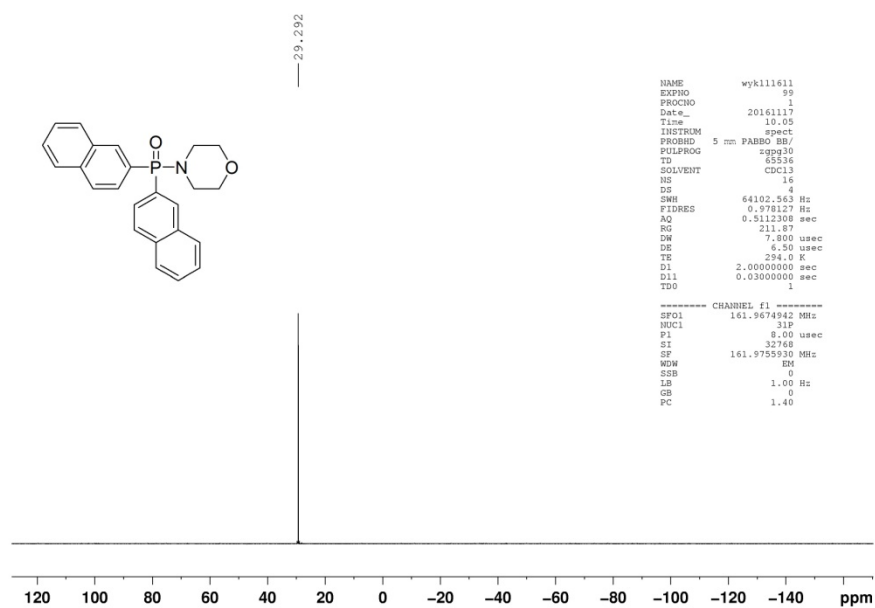

```

NAME      wyk111611
EXPNO     95
PROCNO    1
Date_     20161117
Time      10.05
INSTRUM   spect
PROBHD    5 mm F4BBO BB/
PULPROG   zgpg30
TD         65536
SOLVENT   CDCl3
NS         16
DS         4
SWH        64102.563 Hz
FIDRES     0.978127 Hz
AQ         0.5112301 sec
RG         211.87
DW         7.800 usec
DE         6.50 usec
TE         294.0 K
D1         2.00000000 sec
D11        0.03000000 sec
TD0        1
----- CHANNEL f1 -----
SFO1      161.9674942 MHz
NUC1       31P
P1         8.00 usec
SI         32768
SF         161.9755930 MHz
WDW        EM
SSB        0
LB         1.00 Hz
GB         0
PC         1.40

```

## <sup>1</sup>H NMR of 3ia

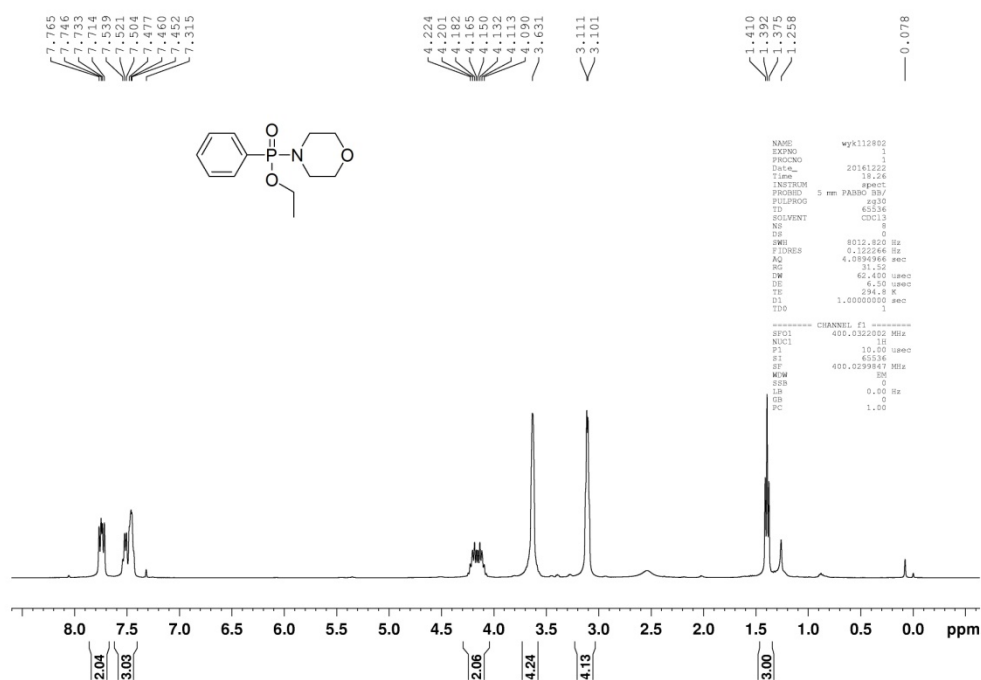

```

NAME      wyk112882
EXPNO     1
PROCNO    1
Date_     20161222
Time      16.26
INSTRUM   spect
PROBHD    5 mm F4BBO BB/
PULPROG   zgpg30
TD         65536
SOLVENT   CDCl3
NS         8
DS         0
SWH        8012.820 Hz
FIDRES     0.1222446 Hz
AQ         4.0894966 sec
RG         31.52
DW         62.400 usec
DE         4.50 usec
TE         294.8 K
D1         1.00000000 sec
TD0        1
----- CHANNEL f1 -----
SFO1      400.0322002 MHz
NUC1       1H
P1         10.00 usec
SI         65536
SF         400.0299867 MHz
WDW        EM
SSB        0
LB         0.00 Hz
GB         0
PC         1.00

```

## <sup>13</sup>C NMR of 3ia

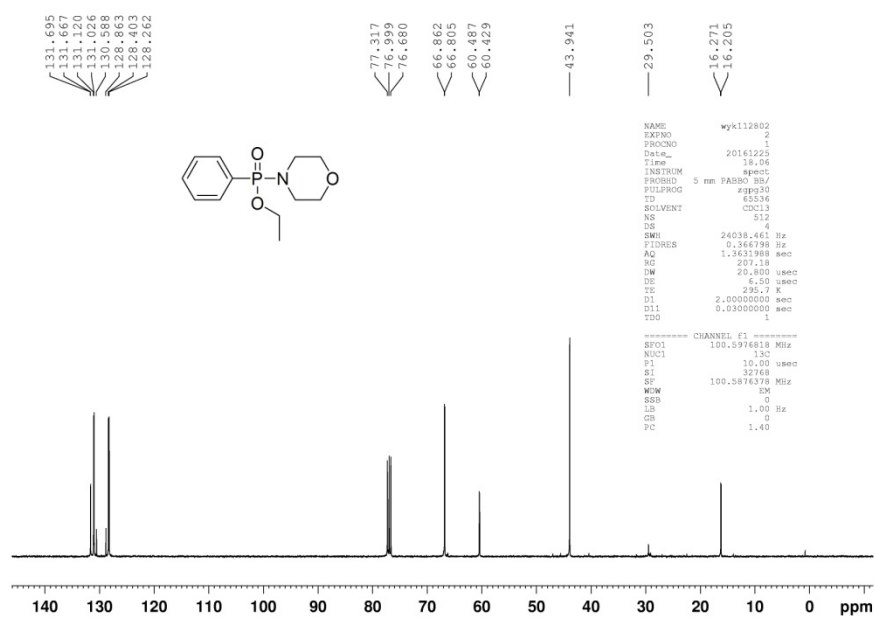

<sup>31</sup>P NMR of **3ia**

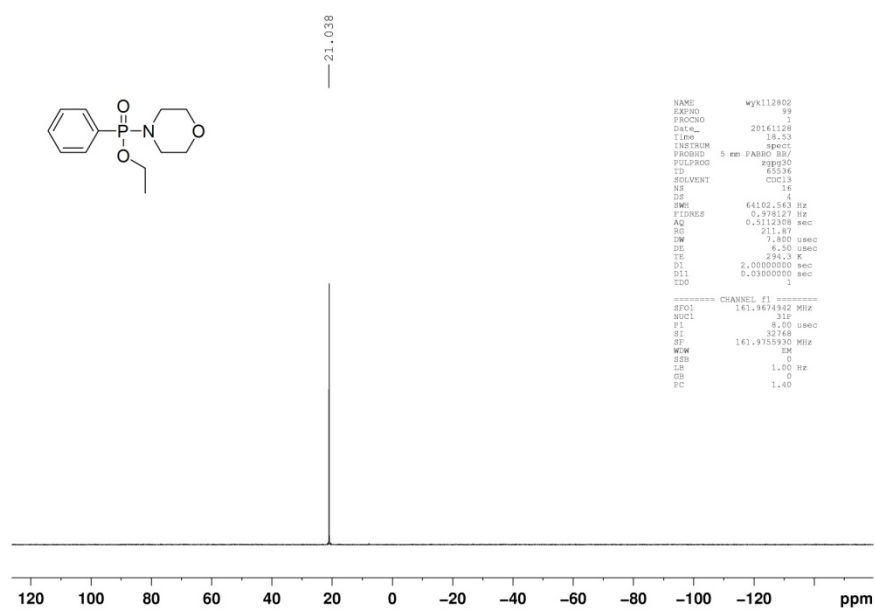

<sup>1</sup>H NMR of **3cb**

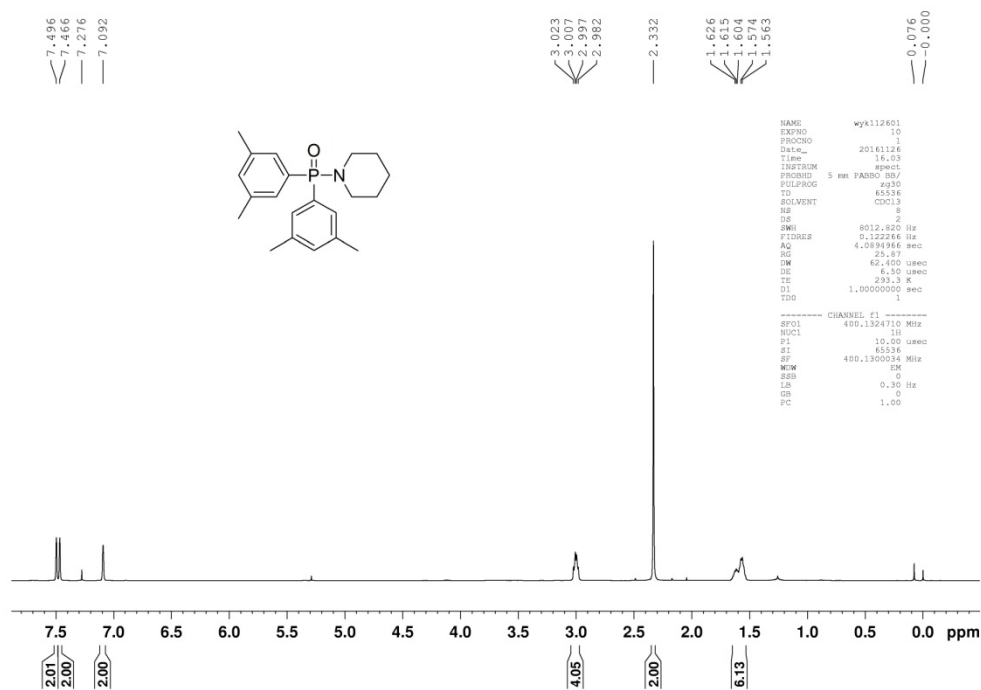

<sup>13</sup>C NMR of **3cb**

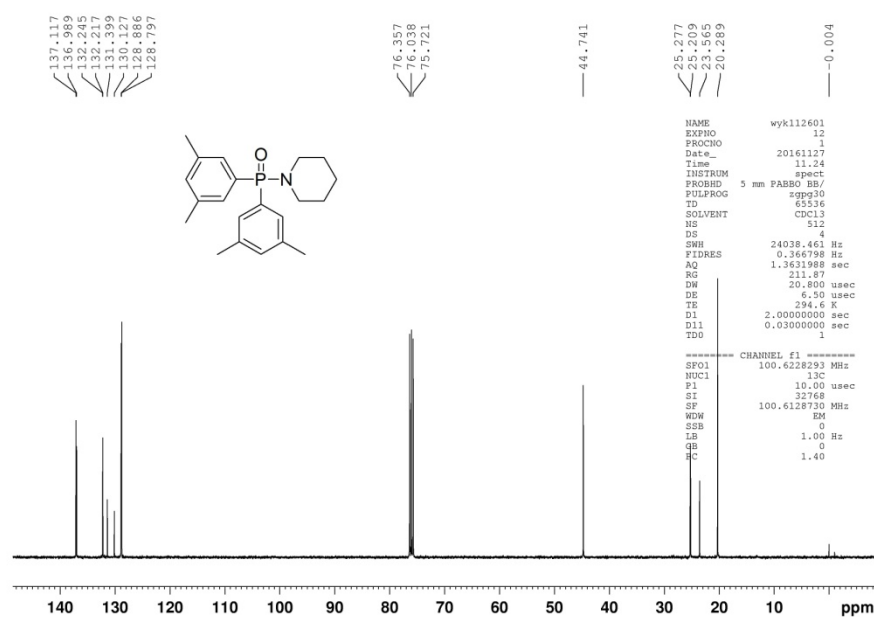

<sup>31</sup>P NMR of **3cb**



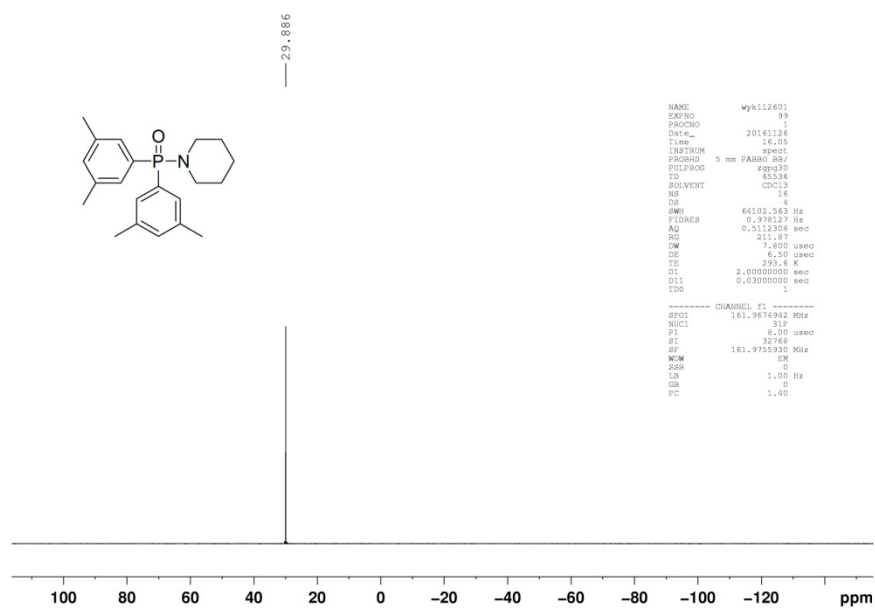

### <sup>1</sup>H NMR of 3ck

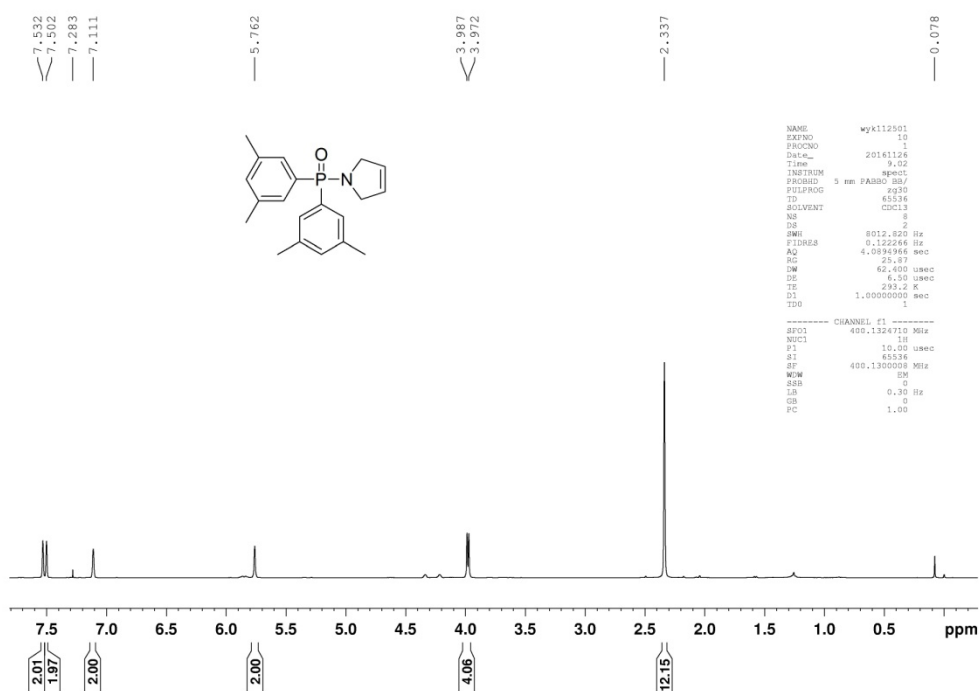

### <sup>13</sup>C NMR of 3ck

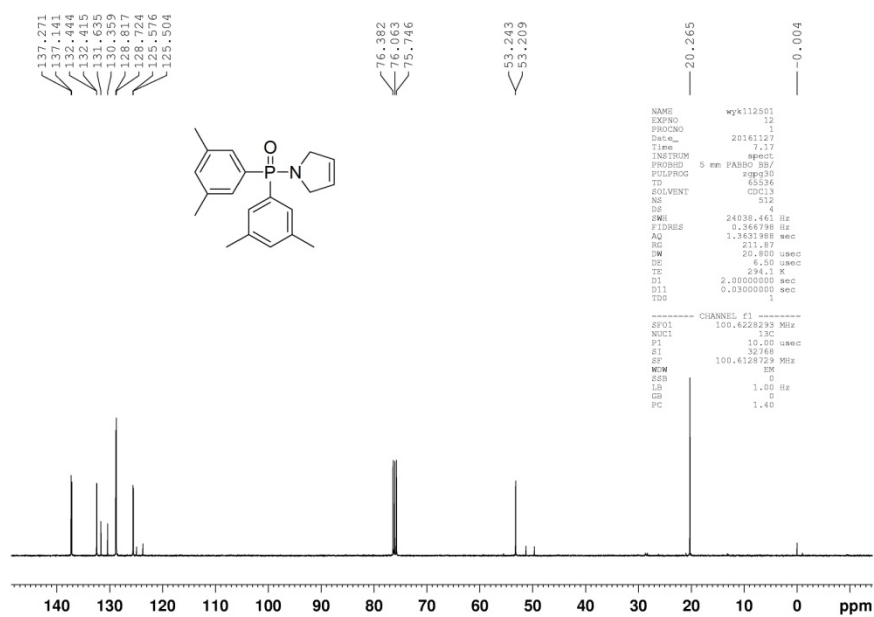

<sup>31</sup>P NMR of **3ck**

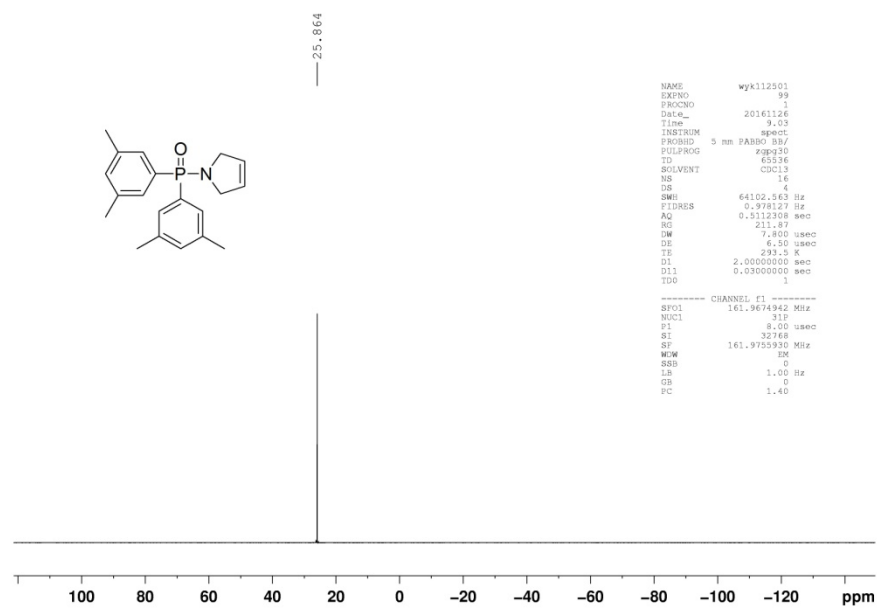

<sup>1</sup>H NMR of **3ja**

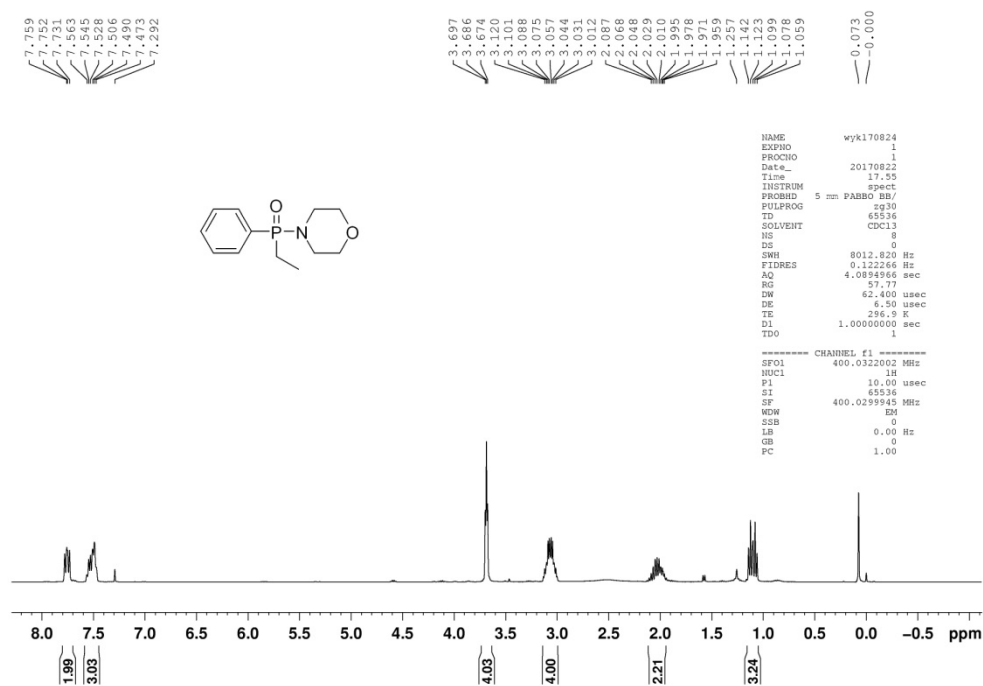

<sup>13</sup>C NMR of **3ja**

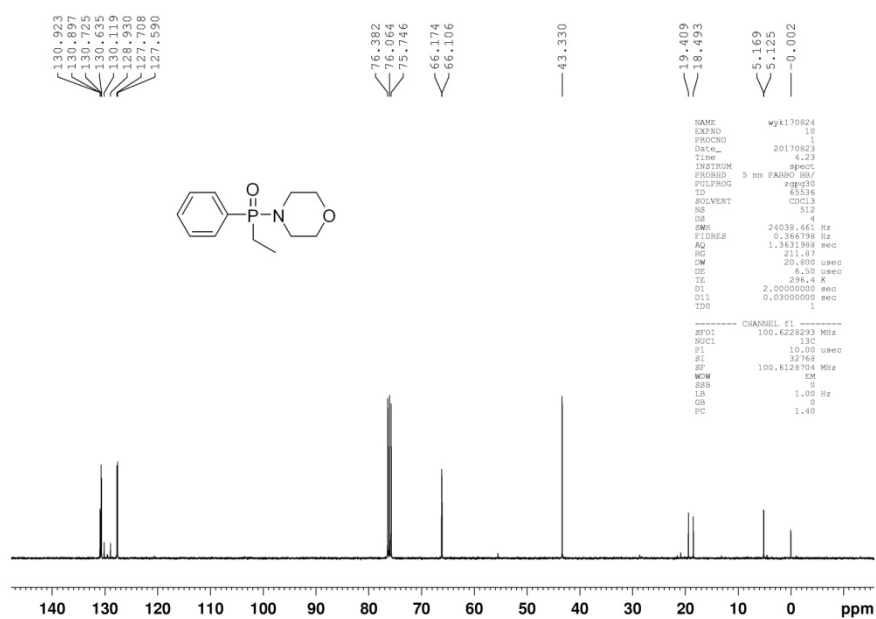

<sup>31</sup>P NMR of **3ja**

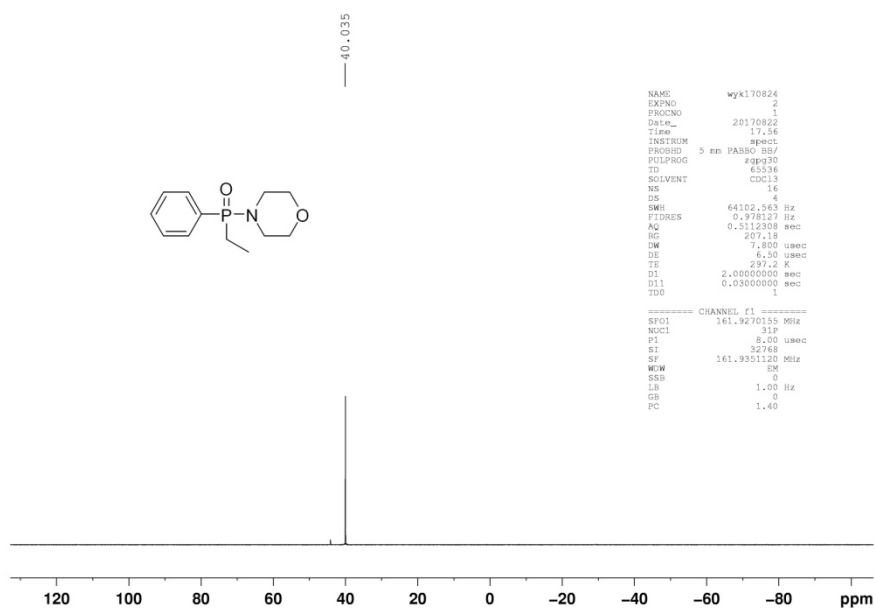

## Crystal structure data

A single crystal for X-ray analysis of **3ac** was obtained by recrystallisation from ethyl acetate / petroleum ether.

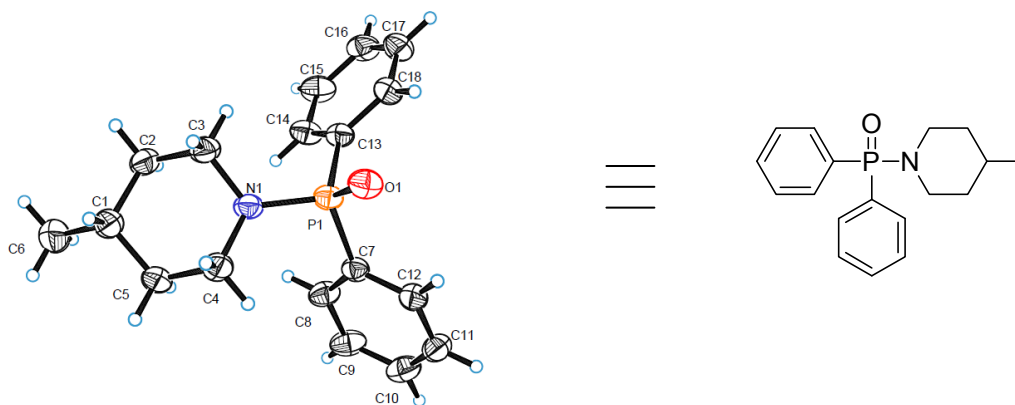

**CCDC-1511510**

**Table 1 Crystal data and structure refinement for 3ac.**

|                     |                                     |
|---------------------|-------------------------------------|
| Identification code | wyk161008                           |
| Empirical formula   | C <sub>18</sub> H <sub>22</sub> NOP |
| Formula weight      | 299.33                              |
| Temperature/K       | 292(2)                              |
| Crystal system      | triclinic                           |
| Space group         | P-1                                 |

|                                                |                                                                |
|------------------------------------------------|----------------------------------------------------------------|
| a/Å                                            | 8.8111(7)                                                      |
| b/Å                                            | 8.8406(6)                                                      |
| c/Å                                            | 11.0875(8)                                                     |
| $\alpha/^\circ$                                | 71.938(6)                                                      |
| $\beta/^\circ$                                 | 83.952(6)                                                      |
| $\gamma/^\circ$                                | 85.034(6)                                                      |
| Volume/Å <sup>3</sup>                          | 815.21(11)                                                     |
| Z                                              | 2                                                              |
| $\rho_{\text{calc}}/\text{g/cm}^3$             | 1.219                                                          |
| $\mu/\text{mm}^{-1}$                           | 1.469                                                          |
| F(000)                                         | 320.0                                                          |
| Crystal size/mm <sup>3</sup>                   | 0.180 × 0.150 × 0.100                                          |
| Radiation                                      | CuK $\alpha$ ( $\lambda$ = 1.54184)                            |
| 2 $\theta$ range for data collection/ $^\circ$ | 8.418 to 142.476                                               |
| Index ranges                                   | -10 ≤ h ≤ 10, -9 ≤ k ≤ 10, -13 ≤ l ≤ 13                        |
| Reflections collected                          | 5167                                                           |
| Independent reflections                        | 3048 [ $R_{\text{int}}$ = 0.0328, $R_{\text{sigma}}$ = 0.0340] |
| Data/restraints/parameters                     | 3048/0/191                                                     |
| Goodness-of-fit on $F^2$                       | 1.082                                                          |
| Final R indexes [ $I \geq 2\sigma(I)$ ]        | $R_1$ = 0.0676, $wR_2$ = 0.1760                                |
| Final R indexes [all data]                     | $R_1$ = 0.0746, $wR_2$ = 0.1887                                |
| Largest diff. peak/hole / e Å <sup>-3</sup>    | 0.58/-0.39                                                     |

**Table 2 Fractional Atomic Coordinates ( $\times 10^4$ ) and Equivalent Isotropic Displacement Parameters ( $\text{\AA}^2 \times 10^3$ ) for wyk161008.  $U_{\text{eq}}$  is defined as 1/3 of the trace of the orthogonalised  $U_{ij}$  tensor.**

| Atom | x         | y         | z          | U(eq)   |
|------|-----------|-----------|------------|---------|
| P1   | 2131.8(6) | 6576.8(7) | 7435.0(6)  | 48.8(2) |
| O1   | 1020(2)   | 7244(2)   | 8248.3(18) | 62.2(5) |
| N1   | 2161(2)   | 7343(2)   | 5869.9(19) | 52.2(5) |
| C13  | 4072(3)   | 6717(3)   | 7767(2)    | 50.5(5) |
| C7   | 1894(2)   | 4483(3)   | 7703(2)    | 49.2(5) |
| C12  | 996(3)    | 3678(3)   | 8779(2)    | 57.5(6) |
| C18  | 4302(3)   | 7081(3)   | 8869(2)    | 60.5(6) |
| C4   | 938(3)    | 7046(3)   | 5176(3)    | 60.4(6) |
| C5   | 1573(3)   | 7039(3)   | 3860(3)    | 61.7(7) |
| C14  | 5336(3)   | 6413(3)   | 7004(3)    | 62.9(6) |
| C8   | 2640(3)   | 3636(3)   | 6926(3)    | 60.5(6) |
| C3   | 2785(3)   | 8915(3)   | 5216(3)    | 61.6(6) |
| C2   | 3464(3)   | 8953(3)   | 3903(3)    | 64.4(7) |
| C11  | 863(3)    | 2042(3)   | 9076(3)    | 67.6(7) |
| C1   | 2318(3)   | 8586(3)   | 3104(3)    | 63.5(7) |

|     |         |         |         |          |
|-----|---------|---------|---------|----------|
| C10 | 1598(3) | 1222(3) | 8309(3) | 72.8(8)  |
| C17 | 5772(4) | 7151(4) | 9183(3) | 71.3(8)  |
| C9  | 2476(3) | 2017(4) | 7217(3) | 72.9(8)  |
| C16 | 7012(3) | 6851(4) | 8423(3) | 73.1(8)  |
| C15 | 6807(3) | 6488(4) | 7326(3) | 73.0(8)  |
| C6  | 3066(5) | 8489(5) | 1827(3) | 89.3(10) |

**Table 3** Anisotropic Displacement Parameters ( $\text{\AA}^2 \times 10^3$ ) for 3ac. The Anisotropic displacement factor exponent takes the form:  $-2\pi^2[h^2a^{*2}U_{11}+2hka^*b^*U_{12}+\dots]$ .

| Atom | U <sub>11</sub> | U <sub>22</sub> | U <sub>33</sub> | U <sub>23</sub> | U <sub>13</sub> | U <sub>12</sub> |
|------|-----------------|-----------------|-----------------|-----------------|-----------------|-----------------|
| P1   | 40.9(4)         | 51.5(4)         | 58.3(4)         | -22.0(3)        | -5.6(2)         | -4.4(2)         |
| O1   | 51.4(9)         | 66.7(11)        | 75.3(12)        | -32.6(9)        | -1.7(8)         | -4.1(8)         |
| N1   | 48(1)           | 52.0(11)        | 59.4(11)        | -17.5(9)        | -9.6(8)         | -9.9(8)         |
| C13  | 46.9(12)        | 47.8(12)        | 60.1(13)        | -18.5(10)       | -10.3(10)       | -5.4(9)         |
| C7   | 41.0(11)        | 53.9(12)        | 55.0(12)        | -17.3(10)       | -9.3(9)         | -5.2(9)         |
| C12  | 54.4(13)        | 65.1(15)        | 55.2(13)        | -18.4(11)       | -8(1)           | -10.2(11)       |
| C18  | 60.1(14)        | 66.8(15)        | 58.5(14)        | -20.9(12)       | -12.7(11)       | -8.0(12)        |
| C4   | 43.1(12)        | 68.1(15)        | 67.8(15)        | -13.4(12)       | -12.1(10)       | -9.0(11)        |
| C5   | 56.3(14)        | 68.3(15)        | 64.1(14)        | -18.9(12)       | -17.3(11)       | -13.0(12)       |
| C14  | 49.9(13)        | 69.9(16)        | 80.5(17)        | -38.3(13)       | -8.7(12)        | -5.0(11)        |
| C8   | 48.5(13)        | 59.1(14)        | 77.3(16)        | -27.0(12)       | 4.9(11)         | -10.5(11)       |
| C3   | 70.4(16)        | 45.5(12)        | 71.3(16)        | -17.0(11)       | -15.3(12)       | -7.9(11)        |
| C2   | 63.9(15)        | 57.6(14)        | 68.6(15)        | -9.2(12)        | -10.3(12)       | -17.9(12)       |
| C11  | 69.1(17)        | 60.3(15)        | 67.3(16)        | -5.6(12)        | -9.1(13)        | -17.7(13)       |
| C1   | 60.7(15)        | 60.6(14)        | 66.8(15)        | -11.7(12)       | -16.0(12)       | -6.1(12)        |
| C10  | 65.0(17)        | 51.1(14)        | 99(2)           | -14.0(14)       | -15.8(15)       | -9.4(12)        |
| C17  | 71.1(18)        | 79.4(19)        | 68.7(17)        | -21.5(14)       | -26.9(14)       | -11.4(14)       |
| C9   | 57.1(15)        | 60.4(15)        | 110(2)          | -40.3(16)       | 1.4(15)         | -5.2(12)        |
| C16  | 56.7(16)        | 70.5(17)        | 95(2)           | -19.4(15)       | -31.1(15)       | -7.6(13)        |
| C15  | 44.5(13)        | 75.6(18)        | 107(2)          | -39.2(17)       | -7.8(13)        | -1.9(12)        |
| C6   | 97(2)           | 103(3)          | 67.6(18)        | -21.0(17)       | -4.2(17)        | -25(2)          |

**Table 4** Bond Lengths for 3ac.

| Atom | Atom | Length/ $\text{\AA}$ | Atom | Atom | Length/ $\text{\AA}$ |
|------|------|----------------------|------|------|----------------------|
| P1   | O1   | 1.4712(19)           | C4   | C5   | 1.508(4)             |
| P1   | N1   | 1.654(2)             | C5   | C1   | 1.527(4)             |
| P1   | C13  | 1.809(2)             | C14  | C15  | 1.392(4)             |
| P1   | C7   | 1.809(2)             | C8   | C9   | 1.383(4)             |
| N1   | C4   | 1.474(3)             | C3   | C2   | 1.506(4)             |
| N1   | C3   | 1.478(3)             | C2   | C1   | 1.528(4)             |
| C13  | C14  | 1.385(4)             | C11  | C10  | 1.361(5)             |

|     |     |          |     |     |          |
|-----|-----|----------|-----|-----|----------|
| C13 | C18 | 1.394(3) | C1  | C6  | 1.522(4) |
| C7  | C12 | 1.389(3) | C10 | C9  | 1.388(5) |
| C7  | C8  | 1.390(4) | C17 | C16 | 1.367(4) |
| C12 | C11 | 1.392(4) | C16 | C15 | 1.383(5) |
| C18 | C17 | 1.387(4) |     |     |          |

**Table 5 Bond Angles for 3ac.**

| Atom | Atom | Atom | Angle/°    | Atom | Atom | Atom | Angle/°    |
|------|------|------|------------|------|------|------|------------|
| O1   | P1   | N1   | 119.37(11) | C17  | C18  | C13  | 120.3(3)   |
| O1   | P1   | C13  | 111.30(11) | N1   | C4   | C5   | 109.75(19) |
| N1   | P1   | C13  | 103.76(10) | C4   | C5   | C1   | 112.4(2)   |
| O1   | P1   | C7   | 111.76(11) | C13  | C14  | C15  | 120.5(3)   |
| N1   | P1   | C7   | 103.40(10) | C9   | C8   | C7   | 120.3(3)   |
| C13  | P1   | C7   | 106.12(11) | N1   | C3   | C2   | 109.4(2)   |
| C4   | N1   | C3   | 110.89(19) | C3   | C2   | C1   | 112.8(2)   |
| C4   | N1   | P1   | 120.60(16) | C10  | C11  | C12  | 120.4(3)   |
| C3   | N1   | P1   | 120.66(16) | C6   | C1   | C5   | 111.2(3)   |
| C14  | C13  | C18  | 118.7(2)   | C6   | C1   | C2   | 111.7(3)   |
| C14  | C13  | P1   | 122.86(18) | C5   | C1   | C2   | 109.2(2)   |
| C18  | C13  | P1   | 118.3(2)   | C11  | C10  | C9   | 120.1(3)   |
| C12  | C7   | C8   | 119.0(2)   | C16  | C17  | C18  | 120.4(3)   |
| C12  | C7   | P1   | 117.93(19) | C8   | C9   | C10  | 120.0(3)   |
| C8   | C7   | P1   | 122.92(18) | C17  | C16  | C15  | 120.1(2)   |
| C7   | C12  | C11  | 120.1(3)   | C16  | C15  | C14  | 119.9(3)   |

**Table 6 Torsion Angles for 3ac.**

| A   | B  | C   | D   | Angle/°     | A   | B   | C   | D   | Angle/°     |
|-----|----|-----|-----|-------------|-----|-----|-----|-----|-------------|
| O1  | P1 | N1  | C4  | -72.9(2)    | C3  | N1  | C4  | C5  | 61.4(3)     |
| C13 | P1 | N1  | C4  | 162.6(2)    | P1  | N1  | C4  | C5  | -149.27(19) |
| C7  | P1 | N1  | C4  | 51.9(2)     | N1  | C4  | C5  | C1  | -56.8(3)    |
| O1  | P1 | N1  | C3  | 73.4(2)     | C18 | C13 | C14 | C15 | -0.7(4)     |
| C13 | P1 | N1  | C3  | -51.1(2)    | P1  | C13 | C14 | C15 | -177.9(2)   |
| C7  | P1 | N1  | C3  | -161.73(19) | C12 | C7  | C8  | C9  | 0.6(4)      |
| O1  | P1 | C13 | C14 | -169.4(2)   | P1  | C7  | C8  | C9  | 176.6(2)    |
| N1  | P1 | C13 | C14 | -39.8(2)    | C4  | N1  | C3  | C2  | -61.3(3)    |
| C7  | P1 | C13 | C14 | 68.8(2)     | P1  | N1  | C3  | C2  | 149.45(19)  |
| O1  | P1 | C13 | C18 | 13.4(2)     | N1  | C3  | C2  | C1  | 56.8(3)     |
| N1  | P1 | C13 | C18 | 143.0(2)    | C7  | C12 | C11 | C10 | -0.7(4)     |
| C7  | P1 | C13 | C18 | -108.4(2)   | C4  | C5  | C1  | C6  | 175.1(2)    |
| O1  | P1 | C7  | C12 | -14.0(2)    | C4  | C5  | C1  | C2  | 51.4(3)     |
| N1  | P1 | C7  | C12 | -143.65(18) | C3  | C2  | C1  | C6  | -175.0(3)   |
| C13 | P1 | C7  | C12 | 107.48(19)  | C3  | C2  | C1  | C5  | -51.6(3)    |

|     |     |     |     |             |     |     |     |     |         |
|-----|-----|-----|-----|-------------|-----|-----|-----|-----|---------|
| O1  | P1  | C7  | C8  | 170.0(2)    | C12 | C11 | C10 | C9  | -0.6(4) |
| N1  | P1  | C7  | C8  | 40.3(2)     | C13 | C18 | C17 | C16 | -0.6(4) |
| C13 | P1  | C7  | C8  | -68.5(2)    | C7  | C8  | C9  | C10 | -1.9(4) |
| C8  | C7  | C12 | C11 | 0.7(3)      | C11 | C10 | C9  | C8  | 1.9(5)  |
| P1  | C7  | C12 | C11 | -175.50(19) | C18 | C17 | C16 | C15 | 0.6(5)  |
| C14 | C13 | C18 | C17 | 0.6(4)      | C17 | C16 | C15 | C14 | -0.7(5) |
| P1  | C13 | C18 | C17 | 178.0(2)    | C13 | C14 | C15 | C16 | 0.8(5)  |

**Table 7 Hydrogen Atom Coordinates ( $\text{\AA} \times 10^4$ ) and Isotropic Displacement Parameters ( $\text{\AA}^2 \times 10^3$ ) for 3ac.**

| <b>Atom</b> | <b>x</b> | <b>y</b> | <b>z</b> | <b>U(eq)</b> |
|-------------|----------|----------|----------|--------------|
| H12         | 481      | 4232     | 9302     | 69           |
| H18         | 3466     | 7278     | 9396     | 73           |
| H4A         | 122      | 7869     | 5114     | 73           |
| H4B         | 518      | 6027     | 5635     | 73           |
| H5A         | 752      | 6879     | 3400     | 74           |
| H5B         | 2324     | 6153     | 3930     | 74           |
| H14         | 5201     | 6156     | 6272     | 75           |
| H8          | 3252     | 4159     | 6207     | 73           |
| H3A         | 3565     | 9106     | 5699     | 74           |
| H3B         | 1977     | 9747     | 5155     | 74           |
| H2A         | 4328     | 8180     | 3978     | 77           |
| H2B         | 3841     | 9999     | 3469     | 77           |
| H11         | 269      | 1507     | 9803     | 81           |
| H1          | 1518     | 9450     | 2943     | 76           |
| H10         | 1513     | 128      | 8518     | 87           |
| H17         | 5915     | 7405     | 9915     | 86           |
| H9          | 2953     | 1461     | 6681     | 87           |
| H16         | 7994     | 6890     | 8643     | 88           |
| H15         | 7651     | 6295     | 6804     | 88           |
| H6A         | 3871     | 7664     | 1965     | 134          |
| H6B         | 3482     | 9491     | 1356     | 134          |
| H6C         | 2316     | 8249     | 1354     | 134          |

## checkCIF (basic structural check) running

---

*Checking for embedded fcf data in CIF*

*Found embedded fcf data in CIF. Extracting fcf data from uploaded CIF, please wait*

## checkCIF/PLATON (basic structural check)



---

Structure factors have been supplied for datablock(s) shelxl

THIS REPORT IS FOR GUIDANCE ONLY. IF USED AS PART OF A REVIEW PROCEDURE FOR PUBLICATION, IT SHOULD NOT REPLACE THE EXPERTISE OF AN EXPERIENCED CRYSTALLOGRAPHIC REFEREE.

No syntax errors found.

[CIF dictionary](#)

Please wait while processing ....

[Interpreting this report](#)

[Structure factor report](#)

## Datablock: shelxl

---

Bond precision: C-C = 0.0041 Å Wavelength=1.54184

Cell: a=8.8111 (7) b=8.8406 (6) c=11.0875 (8)  
alpha=71.938 (6) beta=83.952 (6) gamma=85.034 (6)

Temperature: 292 K

|                                                                                    | Calculated                            | Reported                              |
|------------------------------------------------------------------------------------|---------------------------------------|---------------------------------------|
| Volume                                                                             | 815.21 (11)                           | 815.21 (11)                           |
| Space group                                                                        | P -1                                  | P -1                                  |
| Hall group                                                                         | -P 1                                  | -P 1                                  |
| Moiety formula                                                                     | C <sub>18</sub> H <sub>22</sub> N O P | ?                                     |
| Sum formula                                                                        | C <sub>18</sub> H <sub>22</sub> N O P | C <sub>18</sub> H <sub>22</sub> N O P |
| Mr                                                                                 | 299.34                                | 299.33                                |
| Dx, g cm <sup>-3</sup>                                                             | 1.219                                 | 1.219                                 |
| Z                                                                                  | 2                                     | 2                                     |
| Mu (mm <sup>-1</sup> )                                                             | 1.469                                 | 1.469                                 |
| F000                                                                               | 320.0                                 | 320.0                                 |
| F000'                                                                              | 321.36                                |                                       |
| h, k, lmax                                                                         | 10, 10, 13                            | 10, 10, 13                            |
| Nref                                                                               | 3162                                  | 3048                                  |
| Tmin, Tmax                                                                         | 0.768, 0.863                          | 0.427, 1.000                          |
| Tmin'                                                                              | 0.768                                 |                                       |
| Correction method= # Reported T Limits: Tmin=0.427 Tmax=1.000 AbsCorr = MULTI-SCAN |                                       |                                       |
| Data completeness=                                                                 | 0.964                                 | Theta(max)= 71.238                    |
| R(reflections)=                                                                    | 0.0676 ( 2605)                        | wR2(reflections)= 0.1887 ( 3048)      |
| S =                                                                                | 1.082                                 | Npar= 191                             |

---

The following ALERTS were generated. Each ALERT has the format

**test-name\_ALERT\_alert-type\_alert-level.**

Click on the hyperlinks for more details of the test.

---

## ● Alert level C

PLAT340\_ALERT\_3\_C Low Bond Precision on C-C Bonds ..... 0.00412 Ang.  
PLAT911\_ALERT\_3\_C Missing # FCF Refl Between THmin & STh/L= 0.600 36  
Report

---

## ● Alert level G

PLAT072\_ALERT\_2\_G SHELXL First Parameter in WGHT Unusually Large 0.12 Report  
PLAT154\_ALERT\_1\_G The s.u.'s on the Cell Angles are Equal ..(Note) 0.006 Degree  
PLAT912\_ALERT\_4\_G Missing # of FCF Reflections Above STh/L= 0.600 79 Note  
PLAT978\_ALERT\_2\_G Number C-C Bonds with Positive Residual Density. 9 Note

---

- 0 **ALERT level A** = Most likely a serious problem - resolve or explain
- 0 **ALERT level B** = A potentially serious problem, consider carefully
- 2 **ALERT level C** = Check. Ensure it is not caused by an omission or oversight
- 4 **ALERT level G** = General information/check it is not something unexpected

- 1 ALERT type 1 CIF construction/syntax error, inconsistent or missing data
  - 2 ALERT type 2 Indicator that the structure model may be wrong or deficient
  - 2 ALERT type 3 Indicator that the structure quality may be low
  - 1 ALERT type 4 Improvement, methodology, query or suggestion
  - 0 ALERT type 5 Informative message, check
- 

### Validation response form

Please find below a validation response form (VRF) that can be filled in and pasted into your CIF.

# start Validation Reply Form

\_vrf\_PLAT340\_shelxl

;

PROBLEM: Low Bond Precision on C-C Bonds ..... 0.00412 Ang.

RESPONSE: ...

;

\_vrf\_PLAT911\_shelxl

;

PROBLEM: Missing # FCF Refl Between THmin & STh/L= 0.600 36 Report

RESPONSE: ...

;

# end Validation Reply Form

---

It is advisable to attempt to resolve as many as possible of the alerts in all categories. Often the minor alerts point to easily fixed oversights, errors and omissions in your CIF or

refinement strategy, so attention to these fine details can be worthwhile. In order to resolve some of the more serious problems it may be necessary to carry out additional measurements or structure refinements. However, the purpose of your study may justify the reported deviations and the more serious of these should normally be commented upon in the discussion or experimental section of a paper or in the "special\_details" fields of the CIF. checkCIF was carefully designed to identify outliers and unusual parameters, but every test has its limitations and alerts that are not important in a particular case may appear. Conversely, the absence of alerts does not guarantee there are no aspects of the results needing attention. It is up to the individual to critically assess their own results and, if necessary, seek expert advice.

### Publication of your CIF in IUCr journals

A basic structural check has been run on your CIF. These basic checks will be run on all CIFs submitted for publication in IUCr journals (*Acta Crystallographica*, *Journal of Applied Crystallography*, *Journal of Synchrotron Radiation*); however, if you intend to submit to *Acta Crystallographica Section C* or *E* or *IUCrData*, you should make sure that [full publication checks](#) are run on the final version of your CIF prior to submission.

### Publication of your CIF in other journals

Please refer to the *Notes for Authors* of the relevant journal for any special instructions relating to CIF submission.

---

**PLATON version of 26/02/2017; check.def file version of 21/02/2017**

**Datablock shelxl- ellipsoid plot**

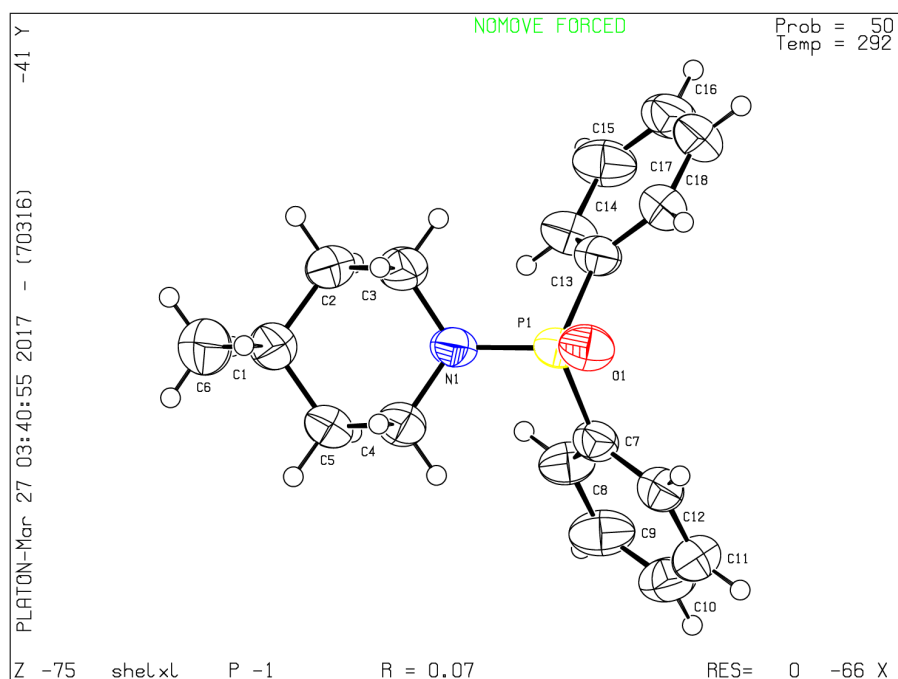

---

[Download CIF editor \(publCIF\) from the IUCr](#)  
[Download CIF editor \(enCIFer\) from the CCDC](#)  
[Test a new CIF entry](#)
